# Supplementary material for: The insect-phase gRNA transcriptome in Trypanosoma brucei
Source: PubMed Central journal article supplement — Nucleic Acids Res. 2013 Oct 29;42(3):1873–86. doi: 10.1093/nar/gkt973 (PMC3919587; doi:10.1093/nar/gkt973), 2013-10-29
Supplement: supp_gkt973_nar-01806-h-2013-File014.pdf [file supp_gkt973_nar-01806-h-2013-File014.pdf]

Supplementary Tables 1 – 10. The major gRNA classes involved in editing of the *T. brucei* mRNAs. The gRNA is identified by its complementarity to the 5' (column 1) and 3' (column 2) number of the fully edited mRNA (+1 = 0). The populations were sorted based on both mRNA regions covered and on guiding sequence class. Variations in both 5' and 3' nts outside of the guiding regions were ignored. Transcript copy numbers were determined by adding all gRNAs of the same guiding region sequence. Major sequence classes were defined as containing greater than 100 transcript copies. The specific sequence shown is of the most abundant transcript in the sequence class. In the case of rare gRNA transcripts, the identified gRNAs are shown regardless of copy number. Red nucleotides indicate a mismatch in the aligned sequence (including C:A base pairs). Starred (☆) gRNAs indicate novel gRNAs not found in the KISS database (<http://splicer.unibe.ch/kiss>). The square indicates novel gRNAs with a closely related gRNA (1-5 nt differences) found in the KISS database.

Supplementary Table 1: COIII: Major gRNA classes

| mRNA 5' | mRNA 3' | copy # | COIII major gRNA classes                                                          |
|---------|---------|--------|-----------------------------------------------------------------------------------|
| ☆24     | 70      | 2      | ATATAC AATATACAACGGAATGAGAATATAAGAAAGTGATGATTATT T <sub>10</sub>                  |
| ☆29     | 70      | 112    | ATATAC AATATACAACGGAATGAGAATATAAGAAAGTGATGATA TTAT <sub>11</sub>                  |
| ☆35     | 70      | 1179   | ATAATT AATATACAACGAGATAGAGACGTAAGAAGAT TGATGTAT <sub>11</sub> G                   |
| ☆36     | 73      | 826    | AT ATAATATACAACGAGATGAAGGCATAGAGAAA AGATGGTATATAAT <sub>14</sub>                  |
| 51      | 99      | 721    | ATATAT AACAAAAACTACTAGCGTTGACAGATATATGATGAAAAT T <sub>11</sub> G                  |
| ☆54     | 101     | 1386   | ATAT AAAACAAAAACATCACTGATATTGACGGATATATGATGA TAAAT <sub>11</sub> G                |
| ☆81     | 112     | 834    | GTA GAGTGAAGATAGAGAAATAAAGATATCGTT T <sub>13</sub>                                |
| ☆81     | 116     | 550    | ATATATAATAACAATAGCAGGTAAAGGTGAGAAAAGTGAAGATATCATT T <sub>10</sub>                 |
| ☆81     | 131     | 1      | TACATAATAACAGTGGCGGGTAGAGATAGAAGAATAAAGATACTATT T <sub>8</sub>                    |
| 117     | 156     | 104    | ATATATA TCCAACAACAGAGTAACCGATACATAGTGATAGTG ATAT <sub>13</sub>                    |
| ☆131    | 188     | 109    | ATAT AAAACTACCAAACAGTAAATAGATAAAGTTCTAATAAGTGAGATAATTAAT TGTTAT <sub>13</sub> ATC |
| ☆134    | 188     | 542    | ATAT AAAACTACCAAACAGTAAATAGATAAAGTTCTAATAAGTGAGATAAAT T <sub>8</sub> GTT          |
| 141     | 185     | 126513 | ATAT ATTACCAAACAATAGACGAGTAGATTCTAATAGATGA TTTAAT <sub>12</sub> G                 |
| □141    | 185     | 99     | ATAT ATTACCAAACAATAGACGAGTAGATTCTAATAAATGA TTTAATTAAT <sub>8</sub>                |
| □141    | 185     | 183    | ATAT ATTACCAAACAATAGACAAGTAGATTCTAATAGATGA TTTAAT <sub>8</sub> AT <sub>4</sub>    |
| □141    | 185     | 761    | ATAT ATTACCAAACAATAGATGAGTAGATTCTAATAGATGA TTTAATTAAGT <sub>4</sub>               |
| □142    | 185     | 199    | ATAT ATTACCAAACAATAGACGAGTAGATTCTAATAGATA TTTAATTAT <sub>5</sub>                  |
| □143    | 185     | 116    | ATAT ATTACCAAACAATAGACGAGTAGATTCTAATAGAT CATTTAATTAT <sub>5</sub>                 |
| □145    | 185     | 172    | ATAT ATTACCAAACAATAGACGAGTAGATTCTAATAG CTGATTTAATTTTGT <sub>8</sub>               |
| □146    | 185     | 350    | ATAT ATTACCAAACAATAGACGAGTAGATTCTAATA TATGATTTAAT <sub>5</sub> CT <sub>4</sub>    |
| □147    | 185     | 106    | ATAT ATTACCAAACAATAGACGAGTAGATTCTAAT CGATGATTTAATTAAT <sub>17</sub>               |
| ☆163    | 203     | 2487   | AAA ATAATCAACAATAAGAGAACTGCTAGATGATAGGTGA TATAGAT <sub>10</sub> GTT               |
| 163     | 211     | 861    | ATATT AACCAACAATCAATAAGTAAGAGACTACTAGATGATAGATAA T <sub>14</sub>                  |
| 195     | 247     | 688    | ATAAATAAATACAAAAATCAGCAAGAAAGAGAGTAAGATTGTGATTAAT T <sub>8</sub>                  |
| ☆195    | 247     | 457    | ATAAATAAATACAAAAATCGACAGAGAGAAAAGTAGGATTGTGATTAAT T <sub>7</sub> AT <sub>4</sub>  |
| ☆199    | 243     | 462    | ATAT ACAAATACAAAAATCGATAGAAAAGAAAGTGAGATCATGATT TAT <sub>12</sub>                 |
| ☆204    | 247     | 5008   | ATATAT ACAAACAATAACAGAGATCGACGAGAAAAGAAAGTGAGATT TAT <sub>12</sub>                |
| ☆229    | 274     | 289    | ATA TACAAAACAATCTAACAGTGATAGTAACAGATAGATATAGAGATT T <sub>10</sub>                 |
| ☆258    | 299     | 18740  | ATATAT AAATCAAATAAACTATGTAGAAAAGTTACGAGATAGATTTAATA T <sub>10</sub>               |
| ☆258    | 300     | 814    | ATATAT AAATCAAATAAAATTACGTAGAGAGTTACAGAATAAGTTTAAAT T <sub>10</sub>               |
| ☆261    | 299     | 181    | ATATAT AAATCAAATAAACTATGTAGAAAAGTTACGAGATAGATTT T <sub>8</sub>                    |
| 265     | 310     | 4418   | ATAAAACACAAAAATCAAGTGAACATATGTAGAGGATTGTAAGATAA T <sub>13</sub>                   |
| 265     | 308     | 4452   | AAA AAAACACAAAAATCAAGTGAACATATGTAGAGGATTGTAAGATAA T <sub>11</sub>                 |
| ☆267    | 306     | 435    | ATATAT AACACAAAAATCAGATAGACTATGTAGAAGATTGTGAAAT T <sub>11</sub>                   |
| □284    | 321     | 21     | ATATAAA GATACAACGTAATAAGGCATAGAAGTTAAGTGAATTAT TGT <sub>12</sub>                  |
| 293     | 320     | 1024   | AATACTGT ATATGATGTAGTAAGATATAGAGATTAA T <sub>10</sub>                             |
| □293    | 335     | 1      | AAAAACAATACTGGATATGATGTAGTAAGATATAGAGATTAA TAACT <sub>6</sub>                     |

| mRNA 5' | mRNA 3' | copy # | COIII major gRNA classes continued                                                     |
|---------|---------|--------|----------------------------------------------------------------------------------------|
| 323     | 365     | 33179  | ATAT ATAAAACAACTCGCTATGTAAGAACTGTAAAAAGTGATATT AT <sub>11</sub> G                      |
| □323    | 365     | 301    | ATAT ATAAAACAACTCGCTATGTAAGAACTGTAAAAAGCGATATT AT <sub>8</sub> CT <sub>5</sub>         |
| □330    | 365     | 856    | ATAT ATAAAACAACTCGCTATGTAAGAACTGTAAAAA GTGATATT T <sub>9</sub>                         |
| ☆345    | 391     | 522    | ATATAT ATAATACAACAAGGAGCGTCATAAGTAAAGTGAATTCGTTATAT T <sub>12</sub>                    |
| 345     | 391     | 203    | ATATT ATAATACAACAGAAAATGTCATAAGTGAGATGAATTCGTTATAT T <sub>8</sub>                      |
| ☆362    | 406     | 101    | ATATAT ATAAACATAAATCAGATAGTACAATGAAGAGTGTATAGATAA T <sub>9</sub>                       |
| 376     | 418     | 9942   | ACA TATAACACAAAAATAGACATAGACTGAATGATGCAGTGAAA T <sub>12</sub> G                        |
| 376     | 418     | 169    | ACA TATAACACAAAAATAGACATAGACTGAATGATGCAGTAAAA T <sub>4</sub> AACT <sub>6</sub>         |
| ☆378    | 422     | 1634   | ATAT AACTTACAACACAGAGATAGACATAGATCAGATAATGTGATAA T <sub>13</sub>                       |
| □384    | 418     | 185    | ACA TATAACACAAAAATAGACATAGACTGAATGATGCA TTGAAAT <sub>11</sub>                          |
| ☆397    | 426     | 15     | AAAACGAT AGCAAATTCATGACGTGAAAAATAGATGTAA T <sub>11</sub>                               |
| ☆397    | 436     | 10     | AAAA AAAAAACGAAAGCAGATTACGGTACAGAGATAGATATAG T <sub>9</sub> G                          |
| ☆410    | 449     | 125    | ATATA ATATAAGGTAATGAGAGACGAGGGTAGACTTGTGATATA T <sub>9</sub>                           |
| ☆411    | 449     | 20772  | ATATATA ATATAAGGTAATGAGAGACGAGGGTAGACTTGTGATAC TAT <sub>12</sub>                       |
| ☆413    | 449     | 224    | ATATATA ATATAAGGTAATGAGAGACGAGGGTAGACTTGTGAT T <sub>10</sub>                           |
| ☆409    | 438     | 1420   | ATAATAAGGTAT ACAGAGAACGGAAGCAGACTTATGATATAA T <sub>12</sub>                            |
| 418     | 467     | 451    | ATAC TATAATAAACACAAAATGTGTAAGGTAGATAAGAAGTGAAGGTAAATT ATAT <sub>4</sub>                |
| ☆437    | 469     | 238    | A TACATAATAACAATGAGATATATAAGGTGAAT CGAAAGTGAATAT <sub>12</sub>                         |
| 456     | 499     | 936    | ATAT AAAATACCAATAAAGAACAGAATTATAGTTGTATGATAGATAA AT <sub>12</sub>                      |
| ☆461    | 497     | 66677  | ATACAT AATACCAATAGAAGACAGAATTGTAGTCATGTGATA TTCAT <sub>14</sub>                        |
| ☆461    | 497     | 5941   | ATACAT AATACCAATAGAAGACAGAATCGTAGTCATGTGATA TTCAT <sub>13</sub>                        |
| ☆461    | 497     | 139    | ATACAT AATACCAATAGAAGACAAAATGTAGTCATGTGATA TTCATAT <sub>11</sub>                       |
| ☆462    | 497     | 371    | ATACAT AATACCAATAGAAGACAGAATTGTAGTCATGTGAT T <sub>11</sub>                             |
| 486     | 539     | 653    | ATA TAAATAAAATGTATTTGTCAATGGATTAGATGAATTTAGAGAATATTAATAG T <sub>4</sub>                |
| 487     | 539     | 847    | ATA TAAATAAAATGTATTTGTCAATGGATTAGATGAATTTAGAGAATATTAATA TTAT <sub>11</sub>             |
| 488     | 539     | 4441   | ATA TAAATAAAATGTATTTGTCAATGGATTAGATGAATTTAGAGAATATTAAT TTCT <sub>8</sub>               |
| 490     | 539     | 1630   | ATA TAAATAAAATGTATTTGTCAATGGATTAGATGAATTTAGAGAATATTA T <sub>8</sub> CT <sub>6</sub>    |
| 491     | 539     | 145031 | ATA TAAATAAAATGTATTTGTCAATGGATTAGATGAATTTAGAGAATATT T <sub>10</sub>                    |
| □491    | 539     | 849    | ATA TAAATAAAATGTATTTGTCAATGGATTAGATGAGTTTAGAGAATATT T <sub>10</sub>                    |
| □491    | 539     | 482    | ATA TAAATAAAATGTATTTGTCAATGGATTAGATAAATTTAGAGAATATT T <sub>8</sub> GTT                 |
| □491    | 539     | 353    | ATA TAAATAAAATGTATTTGTCAATGGATTAGATGAATTTAGAAAATATT T <sub>9</sub>                     |
| □495    | 539     | 1052   | ATA TAAATAAAATGTATTTGTCAATGGATTAGATGAATTTAGAGAAT T <sub>11</sub>                       |
| □498    | 539     | 1118   | ATA TAAATAAAATGTATTTGTCAATGGATTAGATGAATTTAGAA TATTAATAG T <sub>4</sub>                 |
| □502    | 539     | 448    | ATA TAAATAAAATGTATTTGTCAATGGATTAGATGAATTT TAGAATAT <sub>6</sub> CT <sub>5</sub>        |
| ☆504    | 535     | 599    | ATAT ATAAAAATGTATTTGTGCGAGGTTAAATGGAT GTAGAAGAT <sub>12</sub>                          |
| ☆524    | 564     | 77     | ATATAT AAATTAACAAATAGACTACTAATAAGTGAGTAAGATGTATT AAT3ATATAT <sub>4</sub>               |
| ☆528    | 565     | 188    | ATATAT AAAATTAACAAGTGAATCACTAACAGATAGATAGAATG ATAT <sub>12</sub> A                     |
| ☆528    | 564     | 181    | ATATT AAATTAACAGATAAGCCACTGACAAATAGATAGAGTG ATAT <sub>12</sub>                         |
| ☆545    | 592     | 150    | ATATAT AAACCTAAATCAAGAACATAGAACAGAGAGATTAGTGAGTAAATTATT T <sub>5</sub> AT <sub>4</sub> |
| ☆547    | 592     | 1442   | ATATAT AAACCTAAATCAAGAACATAGAACAGAGAGATTAGTGAGTAAATTA AT <sub>11</sub>                 |
| ☆548    | 592     | 99540  | ATATAT AAACCTAAATCAAGAACATAGAACAGAGAGATTAGTGAGTAAATT T <sub>11</sub> G                 |
| ☆550    | 592     | 176    | ATATAT AAACCTAAATCAAGAACATAGAACAGAGAGATTAGTGAGTAAA AT <sub>11</sub>                    |
| ☆548    | 592     | 238    | ATATAT AAACCTAAATCAAGAACATAGAACAGAGAGATTAGCGAGTAAATT T <sub>9</sub>                    |
| ☆548    | 592     | 114    | ATATAT AAACCTAAATCAAGAACATAAAAACAGAGAGATTAGTGAGTAAATT T <sub>10</sub>                  |
| ☆551    | 592     | 599    | ATATAT AAACCTAAATCAAGAACATAGAACAGAGAGATTAGTGAGTAA T <sub>13</sub>                      |
| ☆554    | 592     | 504    | ATATAT AAACCTAAATCAAGAACATAGAACAGAGAGATTAGTGAG AAAAT <sub>13</sub>                     |
| ☆555    | 594     | 27720  | ACAT AAAACCTAAACTGAGAATACGAGACAAAGAAATTAGTGA TTAAAT <sub>12</sub>                      |
| ☆558    | 592     | 309    | ATATAT AAACCTAAATCAAGAACATAGAACAGAGAGATTAG GGAGTAAAT <sub>14</sub>                     |
| ☆558    | 594     | 147    | ACAT AAAACCTAAACTGAGAATACGAGACAAAGAAATTAG GGATTAAT <sub>11</sub>                       |
| ☆558    | 593     | 128    | ACATT AAAACCTAAACTGAGAATACAAGACAGAGAGATTAA GGATTAAT <sub>12</sub>                      |

| mRNA 5' | mRNA 3' | copy # | COIII major gRNA classes continued                                                |
|---------|---------|--------|-----------------------------------------------------------------------------------|
| 580     | 622     | 145    | ATATAT ATCATAATACAAGCAATGACGACGAGAAGATTTAGATTAA T <sub>11</sub>                   |
| ☆585    | 629     | 85916  | ATATA GAACTCAATCATAATATGAAGCAATAACAATGAAGAGATTTAA T <sub>12</sub>                 |
| ☆586    | 629     | 1991   | ATATA GAACTCAATCATAATATGAAGCAATAACAATGAAGAGATTTA T <sub>11</sub> C                |
| ☆587    | 629     | 9106   | ATATA GAACTCAATCATAATATGAAGCAATAACAATGAAGAGATTT T <sub>11</sub>                   |
| ☆588    | 629     | 221    | ATATA GAACTCAATCATAATATGAAGCAATAACAATGAAGAGATT AAT <sub>8</sub> AT <sub>4</sub>   |
| ☆585    | 631     | 1447   | ATAT ATAAACTCAATCATAGTATAAGATGACGACAATGAGAAGATTTAA T <sub>12</sub> C              |
| ☆585    | 629     | 276    | ATATA GAACTCAATCATAATATGAAGCAATAACAATGAAAAGATTTAA T <sub>12</sub>                 |
| ☆590    | 629     | 131    | ATATA GAACTCAATCATAATATGAAGCAATAACAATGAAGAGA ATTAATTAT <sub>6</sub>               |
| ☆591    | 629     | 263    | ATATA GAACTCAATCATAATATGAAGCAATAACAATAAGAGA T <sub>3</sub> AAT <sub>7</sub>       |
| ☆592    | 629     | 269    | ATATA GAACTCAATCATAATATGAAGCAATAACAATGAAGA TTTAAT <sub>5</sub> AT <sub>8</sub>    |
| ☆594    | 629     | 150    | ATATA GAACTCAATCATAATATGAAGCAATAACAATGAA TAGATTTAA T <sub>6</sub>                 |
| ☆604    | 647     | 10315  | ATACAAAAAC AAAAACCAAACGATGAACTTGATTGTAGTATAAGATAATA T <sub>13</sub>               |
| ☆605    | 647     | 7606   | ATACAAAAAC AAAAACCAAACGATGAACTTGATTGTAGTATAAGATAAT T <sub>11</sub> AT             |
| ☆604    | 643     | 250    | ATACAAAAACAAAAT ACCGAGCGACAGATTTGATTGTAGTATAAGATAATA T <sub>1</sub>               |
| ☆607    | 647     | 637    | ATACAAAAAC AAAAACCAAACGATGAACTTGATTGTAGTATAAGATA T <sub>9</sub> GT <sub>11</sub>  |
| ☆635    | 669     | 482    | ATATACAATGCAAACCTTA CATGACTGGTTTTATAGAGATGAGAGATTAA T <sub>11</sub> CTT           |
| □635    | 685     | 2      | AT ATACAATGCAGACTCTTATAACTGGTTTTATAGAAGTGAGAAATTA T <sub>14</sub>                 |
| ☆659    | 691     | 649    | ATAT TAAATAACAATGCGAATTTTCATAGTTGGTT CATAGATACAAT <sub>12</sub>                   |
| ☆669    | 717     | 758    | ATAAT AGAACACCACAGCTTAATGTAGTAGATGGCAGTGTAATTTTT T <sub>7</sub> ATT               |
| ☆669    | 706     | 354    | ATATAGAACCAAAAACAG TGCAATTTAGTGTGATAGATGATAGTGTAATTTTT T <sub>7</sub> A           |
| ☆669    | 715     | 160    | ATATAGAACCAAT AACATCGCGACTTAGTGTGATAAGTAATAGTGTAATTTTT T <sub>7</sub>             |
| ☆669    | 722     | 374    | ATAT AATCAAAAACCCGTAACCTTGATGTAGTAGATAGTAGTAAATTTTT T <sub>7</sub>                |
| 699     | 748     | 977    | ATATA TAATAAATCCAATGAAGATAAAGTAGAGTCAGAGATATTATGATT T <sub>10</sub>               |
| 701     | 748     | 2726   | ATA TAATAAATCCAATGAAGATAAAGTAGAGTCAGAGATATTATGAT AT <sub>13</sub>                 |
| ☆706    | 753     | 31331  | ATATAT AAATGTAATAGATCTGATGAAAGTGAGGTAGAATTGAGAATATT T <sub>10</sub>               |
| ☆707    | 753     | 8037   | ATATAT AAATGTAATAGATCTGATGAAAGTGAGGTAGAATTGAGAATAT AT <sub>14</sub> GCCTAAC       |
| ☆713    | 753     | 595    | ATATAT AAATGTAATAGATCTGATGAAAGTGAGGTAGAATTGAGAAT T <sub>9</sub> AACCC             |
| ☆715    | 753     | 182    | ATATAT AAATGTAATAGATCTGATGAAAGTGAGGTAGAATTGAGA TTTAT <sub>8</sub>                 |
| ☆719    | 753     | 131    | ATATAT AAATGTAATAGATCTGATGAAAGTGAGGTAGAATT TAGAATATAT <sub>8</sub>                |
| ☆707    | 753     | 206    | ATATAT AAATGTAATAGATCTGATAAAGTGAGGTAGAATTGAGAATAT AT <sub>6</sub> AT <sub>6</sub> |
| □706    | 753     | 6744   | ATATAT AAATGTAATAGATCCAATGAAGGTAAGATAGAACTGAGAATATT TTTGT <sub>5</sub>            |
| □707    | 753     | 3791   | ATATAT AAATGTAATAGATCCAATGAAGGTAAGATAGAACTGAGAATAT AATTAT <sub>7</sub>            |
| □713    | 753     | 154    | ATATAT AAATGTAATAGATCCAATGAAGGTAAGATAGAACTGAGAAT T <sub>7</sub> GT <sub>6</sub>   |
| □706    | 753     | 1214   | ATATAT AAATGTAATAGATTCAATGAAGGTAAGATAGAACTGAGAATAT T <sub>4</sub> CT <sub>4</sub> |
| □707    | 753     | 1124   | ATATAT AAATGTAATAGATTCAATGAAGGTAAGATAGAACTGAGAATAT AAT <sub>14</sub>              |
| 707     | 752     | 848    | ATATAT AATGTAATAAATCTAATAGAGATAAGATAGAACTGAGGATAT AT <sub>12</sub>                |
| ☆723    | 765     | 2739   | ATATAT AACATGCATAAGATGTAGTGAATCTAGTAAGAGTAAGATAG T <sub>12</sub> CT               |
| ☆728    | 767     | 1193   | ATATAT AAAACATGCATAGAGTGTAGTAAGTTCACTGAAAGTGA TATAGT <sub>3</sub> CT <sub>4</sub> |
| ☆754    | 790     | 153    | ATATAT TAAACAACAACAGAACGCTCTAAGAGAGTATGTATA TGATGTAAT <sub>15</sub>               |
| ☆755    | 815     | 1      | AAATTAACAGACGTATGAAGCAAGTAGATAACAACAAGACACTTAAGAGGGTATGCAT T <sub>3</sub>         |

| mRNA 5' | mRNA 3' | copy # | COIII major gRNA classes continued                                                  |
|---------|---------|--------|-------------------------------------------------------------------------------------|
| ☆771    | 814     | 138    | ACATAT AATTAAACAAACGTATAGAGCAAGTAAGTAGCAGTCAAATATTT T <sub>8</sub> GT <sub>3</sub>  |
| ☆771    | 815     | 25628  | ATAT AAATTAACAGACGTATGAAGCAAGTAGATAGTGATAAGATACTT T <sub>10</sub>                   |
| ☆772    | 815     | 111116 | ATAT AAATTAACAGACGTATGAAGCAAGTAGATAGTGATAAGATACT AT <sub>14</sub>                   |
| ☆773    | 815     | 136    | ATAT AAATTAACAGACGTATGAAGCAAGTAGATAGTGATAAGATAC AAT <sub>11</sub> A                 |
| ☆775    | 815     | 323    | ATAT AAATTAACAGACGTATGAAGCAAGTAGATAGTGATAAGAT T <sub>13</sub> G                     |
| ☆777    | 815     | 188    | ATAT AAATTAACAGACGTATGAAGCAAGTAGATAGTGATAAG TTACTAT <sub>5</sub>                    |
| ☆778    | 815     | 315    | ATAT AAATTAACAGACGTATGAAGCAAGTAGATAGTGATAA TTTTTTAT <sub>4</sub>                    |
| ☆772    | 815     | 230    | ATAT AAATTAACAGACGTATGAAGCAAGTAGATAGCGATAAGATACT AT <sub>8</sub> AT <sub>6</sub>    |
| ☆772    | 815     | 281    | ATAT AAATTAACAAACGTATGAAGCAAGTAGATAGTGATAAGATACT AT <sub>11</sub>                   |
| ☆788    | 829     | 5      | ATATA TATCCATACACAGAAAATTAGATGAACGTGTAATAATGAGTAA TTAT <sub>6</sub> AT <sub>6</sub> |
| ☆796    | 829     | 24     | ATAACAAAACGTGA TATCCATATACAGAGAATTAGATAGATGTATAA T <sub>6</sub>                     |
| ☆802    | 842     | 116    | ATAT AAAACAAAACGTGTATTCATATATGAGAGATTAAGTAAATG ATTTTTAT <sub>10</sub>               |
| 814     | 854     | 66     | ATAT ATACAATACAAAGAAGCGAAACGTGTATCTATATATGGAAA T <sub>6</sub>                       |
| ☆838    | 882     | 109    | ATACAA TAAATCAACAAGATGTCGATATAGATGGATATGATATGAGAGAAT T <sub>6</sub> CT <sub>8</sub> |
| 846     | 891     | 138    | ATAT AAATCAAATAAATTAGCAAGGTGTCAGTGTAATGAGCATGATAT T <sub>6</sub> GT <sub>6</sub>    |
| ☆848    | 890     | 9675   | ATATAT AATCAAATAAATTGACGAGATGTTGATGTAGATAGATATAAT AT <sub>8</sub>                   |
| 880     | 918     | 1822   | ATATAA ATCAGAATAAACAGATCGCAATAGAGAGAATTAAGTTAA TAT <sub>13</sub> C                  |
| ☆882    | 927     | 600    | AA ATATAAAACATCAAGATAAATGGATTGTGATAGAGAAAAGTTAAAT T <sub>11</sub>                   |
| ☆907    | 947     | 787    | ATATAA TATACACACAGATACATAATACGTAGAATGTTAAGATAAGT T <sub>13</sub> GTT                |
| ☆909    | 950     | 126    | ATATA ATTACACACACAGATACGTGATATATAGAATGTTAAGGTAA TATAAT <sub>10</sub>                |
| ☆913    | 946     | 558    | ATAC ATACACACAAATATATAACATATAGAGCATTGAG TTAGATAAT <sub>15</sub>                     |
| 935     | 977     | 2920   | ATATA AATCAACAACGTGAAAAGATATCAATGAGATTGTACATGTAAAT T <sub>12</sub> GTT              |
| ☆942    | 983     | 1160   | ATAT AACTAATCAACAGCTAAGAGAACGTCAATGAGATTATGTG ATTAAT <sub>14</sub>                  |
| ☆963    | 1003    | 111    | ATA TACAAACTACCAATATAAGTTAACTGATCGGTAATTAAGG TTATAT <sub>8</sub> AT <sub>6</sub>    |

Supplementary Table 2: C-Rich Region 3: Major gRNA classes

| mRNA 5' | mRNA 3' | Copy # | CR3 Major gRNA Classes                                                                      |
|---------|---------|--------|---------------------------------------------------------------------------------------------|
| ☆34     | 62      | 18     | ATATGT ACAACAAAACCGAGCAATCAGATAT AGAGTCAAAT <sub>9</sub>                                    |
| ☆40     | 88      | 34162  | ATATAT AAAATGTACAAACGGACAATGAGAGAACAGTCAAATTAGATGATT T <sub>12</sub>                        |
| ☆41     | 88      | 140541 | ATATAT AAAATGTACAAACGGACAATGAGAGAACAGTCAAATTAGATGAT AT <sub>13</sub> C                      |
| ☆46     | 88      | 468    | ATATAT AAAATGTACAAACGGACAATGAGAGAACAGTCAAATTAGATGA AATAT <sub>14</sub>                      |
| ☆47     | 88      | 1270   | ATATAT AAAATGTACAAACGGACAATGAGAGAACAGTCAAATTAGATG T <sub>11</sub>                           |
| ☆48     | 88      | 902    | ATATAT AAAATGTACAAACGGACAATGAGAGAACAGTCAAATTAGAT T <sub>8</sub> GT <sub>5</sub>             |
| ☆49     | 88      | 177    | ATATAT AAAATGTACAAACGGACAATGAGAGAACAGTCAAATTAGA AGATATAT <sub>11</sub>                      |
| ☆50     | 88      | 182    | ATATAT AAAATGTACAAACGGACAATGAGAGAACAGTCAAATTAG TTGTTAATAT <sub>11</sub>                     |
| ☆51     | 88      | 632    | ATATAT AAAATGTACAAACGGACAATGAGAGAACAGTCAAATTA TATGATAATAT <sub>4</sub>                      |
| ☆52     | 88      | 648    | ATATAT AAAATGTACAAACGGACAATGAGAGAACAGTCAAATT T <sub>9</sub>                                 |
| ☆55     | 88      | 170    | ATATAT AAAATGTACAAACGGACAATGAGAGAACAGTGAA T <sub>6</sub> T <sub>12</sub>                    |
| ☆56     | 88      | 133    | ATATAT AAAATGTACAAACGGACAATGAGAGAACAGTGA T <sub>12</sub>                                    |
| ☆40     | 88      | 151    | ATATAT AAAATGTACAAACGGACAATGAGAGAACAGTAAAATTAGATGATT T <sub>5</sub> GT <sub>6</sub>         |
| ☆41     | 88      | 693    | ATATAT AAAATGTACAAACGGACAATGAGAGAACAGTAAAATTAGATGAT AT <sub>12</sub>                        |
| ☆41     | 88      | 212    | ATATAT AAAATGTACAAACGGACAATGAGAGAACAGCGAAATTAGATGAT ATCT <sub>7</sub>                       |
| ☆41     | 88      | 135    | ATATAT AAAATGTACAAATGGACAATGAGAGAACAGTCAAATTAGATGAT AATAT <sub>7</sub>                      |
| ☆41     | 88      | 181    | ATATAT AAAATGTACAAACGGACAATGAGAAAACAGTCAAATTAGATGAT ATCT <sub>15</sub>                      |
| ☆41     | 88      | 106    | ATATAT AAAATGTACAAACAGACAATGAGAGAACAGTCAAATTAGATGAT AATAT <sub>8</sub>                      |
| ☆41     | 88      | 155    | ATATAT AAAATGTACAAACGAACAATGAGAGAACAGTCAAATTAGATGAT AT <sub>13</sub>                        |
|         | 40      | 77     | ATATATAAAATGTACAT ACGAACGATAAAAAGGCGAGTCAAATTAGATAATT TT                                    |
| ☆48     | 87      | 3434   | ATATAATT AAATGTACAGACAAATGATAGAGAGCGATGAGATTAAGT TATAT <sub>12</sub>                        |
|         | 51      | 88     | ATAT AAAATGTACAGACGAGCAGTGAAGAGACAGTGAATTA TACAT <sub>11</sub>                              |
| ☆51     | 86      | 3016   | AAAAATT AATGTACAAATAAACGATAGAGAGACAGTGAATTA TGAT <sub>13</sub>                              |
| ☆78     | 118     | 573    | ATATAT AATCACAAACAAATAGAAAATGAGAGAGGTGTATGA TACTAT <sub>5</sub> CT <sub>5</sub>             |
| ☆105    | 140     | 15770  | A TAGATAACAAACATAAGAGCAAGTCACGAG GTAGATATTGATAT <sub>13</sub> C                             |
| ☆122    | 166     | 27885  | ATAGAAATCCAATAAGAGACAGAAGCTAGATAATGAGTATAAGA TAT <sub>13</sub>                              |
| ☆124    | 166     | 212    | ATAGAAATCCAATAAGAGACAGAAGCTAGATAATGAGTATAA T <sub>11</sub>                                  |
| ☆125    | 166     | 139    | ATAGAAATCCAATAAGAGACAGAAGCTAGATAATGAGTATA T <sub>6</sub> CT <sub>10</sub>                   |
| ☆127    | 166     | 114    | ATAT ACAAATCCAATGAAAAATAAAGACTGAGTGGATG CAAT <sub>4</sub> CT <sub>10</sub>                  |
|         | 123     | 162    | ATATAT AAATCCAATAAGAAATGAAAGCTAGATAGTGAATTAAG T <sub>12</sub> GT <sub>3</sub>               |
| ☆154    | 196     | 1492   | ATAT ATACAACAATAAACTCGTATTAAGTGAAGATGAAGATTTAAT T <sub>8</sub> AT <sub>4</sub>              |
| ☆156    | 199     | 136    | ATAT TAAACACAACGATAGATCTATATTAAGTAGAAGATAGAAATTTA TTTAT <sub>12</sub>                       |
| ☆190    | 230     | 2      | ATATACA ACATATCAAGTGGTAAGATAAGAGAAGAAAGTAGATGTAAT T <sub>6</sub>                            |
| ☆231    | 276     | 2      | AT ATAACAATA <b>C</b> AAATGAGCTAGATAATGGATGATAGTTTGGATAT T <sub>12</sub>                    |
| ☆237    | 279     | 1      | TAT AAAATAACAATA <b>C</b> AAGTGAATTAGATAATGGATGATG TTTCAAT <sub>15</sub>                    |
| ☆226    | 277     | 19     | ATAT AATAACAATATAAACGAACCTGGATGATG <b>T</b> ATAGT <b>A</b> CTTTGATATATA AT <sub>12</sub>    |
| ☆279    | 308     | 2      | ATATAT AAATTATTTGCATACT <b>G</b> AGAT <b>T</b> AGT <b>G</b> ATAGTAAAGTGATTAAT <sub>14</sub> |

Supplementary Table 3: C-Rich Region 4: Major gRNA classes

| mRNA 5' | mRNA 3' | copy # | CR4 Major gRNA classes                                                                |
|---------|---------|--------|---------------------------------------------------------------------------------------|
| ☆25     | 64      | 121    | ATAAT AAAAATGCACAACCTAGAATTGAAGTAAAGTGATGATA TATAT <sub>6</sub> GT <sub>5</sub>       |
| 48      | 103     | 296    | ATA TATATAAAAACACAGACATACTAAGTAAGAGAAAAGAGAGGTGTATGATT T <sub>5</sub> CT <sub>6</sub> |
| ☆87     | 134     | 7793   | ATATAT AAACAACAATAGAGTATATCATAGACTGTATATGAAGCATAAAAT T <sub>10</sub>                  |
| ☆88     | 134     | 208    | T ATATAT AAACAACAATAGAGTATATCATAGACTGTATATGAAGCATAAA AT <sub>5</sub> CT <sub>7</sub>  |
| ☆89     | 134     | 426    | ATATATAT AAACAACAATAGAGTATATCATAGACTGTATATGAAGCATAA CT <sub>8</sub>                   |
| ☆90     | 134     | 143    | ATATATAT AAACAACAATAGAGTATATCATAGACTGTATATGAAGCATA T <sub>8</sub> AT <sub>4</sub>     |
| ☆93     | 139     | 200    | AAA AAACAAAACAACAGTGAATATACCGTAGATTGTATGTGAAAT TATATAT <sub>6</sub>                   |
| ☆127    | 171     | 2      | ATAT ATATACTCACACAAATAGATGAGAGAGATAGAAAAGTAAGATGATA TAT <sub>13</sub>                 |
| 154     | 192     | 3603   | ATATTA AACTATAACAAGGCAGATAGAACGTACCTATATAGATAA T <sub>14</sub>                        |
| 186     | 214     | 7      | AAATCACAGCCTAAAATGACGAGAGAAAAGTAAATGGTTATA T <sub>13</sub> AA                         |
| 186     | 214     | 1      | TAAAAAATCACAGCCTAAAATGACGAGAGAAAAGTAAATGGTTATA TAGAT <sub>5</sub>                     |
| ☆217    | 261     | 14358  | ATAT ATAAACTATACAATTGAAGCACTGATAGAAGGTTGTGATT TAAT <sub>12</sub>                      |
| ☆222    | 261     | 112    | ATAT ATAAACTATACAATTGAAGCACTGATAGAAGGTTG ATTTAATAT <sub>8</sub>                       |
| ☆217    | 261     | 264    | ATAT ATAAACTATACAGTCAAGCACTGATGAGAGATCGTGATT TAAT <sub>13</sub>                       |
| ☆242    | 284     | 9      | AAAAAAA AAAATTATAACGTCATAGAAGAGATAGACTATATGATTAA T <sub>9</sub>                       |
| ☆244    | 295     | 14     | AT AGAAAATAAACAGAAATTGTGACGTCATAAAGAAGATAGATTATATAGTT T <sub>14</sub>                 |
| □280    | 321     | 94     | AAAAA AAAAAACACAAGCGAGATAGAGAAAAGAGATAAATAAGATT T <sub>5</sub>                        |
| □281    | 321     | 631    | AAAA AAAAAACACAAGCGAGATAGAGAAAAGAGATAAATAAGAT GT <sub>5</sub> AT <sub>4</sub>         |
| ☆307    | 352     | 259    | AAAAT ACCAAACAGATCAGATAAAGGCAGTGATATAGAGAATATAAAATA T <sub>12</sub>                   |
| ☆308    | 352     | 725    | ATAAAAT ACCAAACAGATCAGATAAAGGCAGTGATATAGAGAATATAAAAT T <sub>11</sub>                  |
| ☆310    | 352     | 214    | ATAAAAT ACCAAACAGATCAGATAAAGGCAGTGATATAGAGAATATAAA T <sub>12</sub>                    |
| ☆312    | 354     | 675    | ATAT AAACCAACAAGCTGAATAAGAACAGTGATATAGAAGATATA TAT <sub>14</sub>                      |
| ☆325    | 355     | 140    | AT AAAACCAGACAAACTGAATGAAGACAGTAACTAGAGAAGATAT T <sub>10</sub>                        |
| ☆344    | 389     | 863    | ATAT ATAACACAAAACATAACAGAGAGTATAGAGAGAAATGAATGA T <sub>9</sub> AT <sub>5</sub>        |
| ☆375    | 418     | 411    | AAAA AAAAAACAACATAGAAAGTGAATCAGAGAATGACATAAGATATA T <sub>4</sub> CT <sub>6</sub>      |
| ☆378    | 418     | 447    | A AAAAAACAACATAGAAAATAAGTCAGAGAGTAAATATGAGAT TGTTATAAT <sub>5</sub>                   |
| ☆405    | 458     | 4211   | AAAAAAAAAAACAAAGACAAAGAAATCACTCAGAATAGAAGATGGTATAA T <sub>9</sub> CT <sub>4</sub>     |
| ☆406    | 457     | 620    | AAAAAAAAAAACAAAGACAAAGAAATCACTCAGAATAGAAGATGGTATA T <sub>5</sub> CT <sub>7</sub>      |
| ☆407    | 458     | 392    | AAAAAAAAAAACAAAGACAAAGAAATCACTCAGAATAGAAGATGGTAT T <sub>7</sub> AT <sub>4</sub>       |
| ☆406    | 458     | 406    | AAAAAAAAAAACAAAGACAAAGAAATGCTCTAAGATAGAGAATGATATA T <sub>7</sub> CT <sub>7</sub>      |
| ☆410    | 458     | 185    | AAAAAAAAAAACAAAGACAAAGAAATCACTCAGAATAGAAGATGG GATAAAT <sub>8</sub>                    |
| ☆441    | 490     | 238    | ATAACAACCACAGATAGAAATGAACGTAAATGAGAGAGAAAAGATGAAAGT T <sub>11</sub>                   |
| ☆443    | 490     | 3197   | ATAACAACCACAGATAGAAATGAACGTAAATGAGAGAGAAAAGATGAAA T <sub>12</sub> G                   |
| 454     | 498     | 1153   | AT ACAAATAACAACAATCATAAGTAAGAATAGATGTAGATGAGAAA T <sub>11</sub>                       |
| ☆454    | 495     | 282    | ATATAT AAATAACAACAATCAGATGAAGGTAGATATAAGTGAAGAAA T <sub>13</sub> G                    |
| ☆476    | 520     | 766    | ATATAT AATAACAACAATAATCAGATTAGCAGAGTAAATGATAGTTATAAAT T <sub>12</sub> G               |
| 481     | 525     | 390    | ATACAAATAACAACAATAGCCAAGTAAATAGAGTGTATGATGATTA AT <sub>14</sub>                       |
| ☆504    | 548     | 53     | AAAAAAAAAA GCATATAAATAGATCTATATATGAGTGATAGTGACAATTA T <sub>15</sub>                   |
| ☆505    | 548     | 50     | AAAAAAAAAA GCATATAAATAGATCTATATATGAGTGATAGTGACAATT TCT <sub>9</sub>                   |
| ☆505    | 555     | 146    | AA AAAAAACGCATATAAGTGAGCCTATACATAGATAATGATGATAATT TTT                                 |
| ☆543    | 576     | 511    | AAA TTTATAAAACCAAT#CCGTAATTATCTGAGATGAGAAGTGTATA AT <sub>12</sub>                     |

Supplementary Table 4: Cytochrome b major gRNA classes

| mRNA 5' | mRNA 3' | copy # | CYb Major gRNA Classes                                                             |
|---------|---------|--------|------------------------------------------------------------------------------------|
| ☆29     | 62      | 4      | ATAAGAATAACGT AGAAAATAATAGGGATTTATGATGAGATATATTT T <sub>15</sub>                   |
| ☆32     | 62      | 65     | GT AGAAAATAATAGGGATTTATGATGAGATATG CTGTGGATAGT <sub>12</sub>                       |
| ☆32     | 59      | 327    | AAATAATAGGGATTTATGATGAGATATG CTGTGGATAT <sub>14</sub>                              |
| ☆32     | 60      | 255    | AAAATAATAGGGATTTATGATGAGATATG CTGTGGATAT <sub>12</sub>                             |
| ☆32     | 61      | 190    | AAAAATAATAGGGATTTATGATGAGATATG CTGTGGATAT <sub>13</sub>                            |
| ☆32     | 64      | 176    | AA AAAAAATAATAGGGATTTATGATGAGATATG CTGTGGATAGT <sub>9</sub>                        |
| ☆50     | 91      | 5*     | AAAAAAA AAAAGACAATATAGATTTCTGGGTGATAAAAAGGATAATAAA T <sub>5</sub>                  |
| ☆51     | 91      | 10649  | AAAAAAA AAAAGACAATATAGATTTCTGGGTGATAAAAAGGATAATAA CT <sub>5</sub> GT <sub>5</sub>  |
| ☆52     | 91      | 908    | ATAA GAAAGACAATATAGGTTTCTGGGTAATGGAGAGAATAATA T <sub>12</sub> CT <sub>3</sub>      |
| ☆53     | 91      | 18713  | AAAAAAA AAAAGACAGTGTGAATTTCTGAGTAATAAAGGAATAAT T <sub>11</sub>                     |
| □54     | 91      | 339    | AAAAAAA AAAAGACAATGTAGATTTCTGAGTAATGGGGAGGATAA CTAT <sub>3</sub> AT <sub>5</sub> * |

\*matches gCYb560A except for A-run at 5' end.

Supplementary Table 5: MurfII major gRNA classes

| mRNA 5' | mRNA 3' | Copy # | Murf II Major gRNA Classes                                                        |
|---------|---------|--------|-----------------------------------------------------------------------------------|
| 30      | 79      | 2605   | ATAG AAAGCACAAAAATAAAATTAATTAGAGTAATTGGATGTTAAAAAT T <sub>3</sub> CT <sub>7</sub> |

Supplementary Table 6: ND3 (CR5) major gRNA classes.

| mRNA 5' | mRNA 3' | Copy # | ND3 Major gRNA Classes                                                             |
|---------|---------|--------|------------------------------------------------------------------------------------|
| ☆31     | 79      | 70     | ATAT ATAATAAACACAGTATCAGAGACAGATATAGAAGTGATGATAGT T <sub>6</sub> CT <sub>6</sub>   |
| ☆33     | 76      | 313    | ATATATT ATAAACCATGATATCGAAAATGGGTGTAGAAATGATGATA T <sub>12</sub>                   |
| ☆63     | 113     | 1006   | ACATAAGAAACATAAAGAAAAATCTGTGAGTAGACTGATAAGTTATAAT T <sub>11</sub>                  |
| ☆64     | 113     | 84     | AT ACATAAGAAACATAAAAAGAAATCTGTAAGTAGACTAGTAAGTTATAA GT <sub>14</sub>               |
| ☆65     | 113     | 411    | ACATAAGAAACATAAAGAAAAATCTGTGAGTAGACTGATAAGTTATA T <sub>8</sub> GT <sub>6</sub>     |
| 99      | 143     | 826    | AT ATGAAAACAATCAAAGAAGTGTGATAGAAAAGTATAAAAAGGTATAA T <sub>11</sub>                 |
| ☆130    | 170     | 507    | ATATAT CAAATCACACGAAGATCATAGATGACGATGAAGGTAGTTAA TAT <sub>7</sub> GT <sub>10</sub> |
| ☆130    | 170     | 413    | ATACAT CAAATCACACGGAAATCATAGATGGCAATGAAGATAGTTAA T <sub>11</sub>                   |
| 155     | 189     | 236    | AAATAAACACC AACGTGAATTTATATTGTATAGATCGTATGAGAAT AT <sub>10</sub> GTTGT             |
| ☆158    | 205     | 412    | T ATGTATAAACATTAATGTGAGTTTGTGTCGTGATGATTATGTGAA T <sub>15</sub>                    |
| ☆190    | 229     | 4864   | ATATAT AACACTAACAGAATATAGATCTGATGTATAAGATATCA T <sub>13</sub> G                    |
| ☆190    | 229     | 123    | ATATAT AACACTAACAGAATATAGATCTGATGTATAAGATATCG T <sub>13</sub>                      |
| ☆222    | 264     | 384    | AAAAAT AACACAGATAATGGAATTTAATGATATGAGAAATGGATGATTA T <sub>5</sub>                  |
| ☆223    | 264     | 164    | AAAAAT AACACAGATAATGGAATTTAATGATATGAGAAATGGATGAT TCT <sub>17</sub>                 |
| ☆222    | 263     | 3165   | ATAT ATACAAATAATGGGATTTAACGATATAGAGGATGAATGATTA T <sub>13</sub> AT                 |
| ☆223    | 263     | 3225   | TTAT ATACAAATAATGGGATTTAACGATATAGAGGATGAATGAT T <sub>11</sub>                      |
| ☆223    | 263     | 106    | ATAT ATACAAATAATGGGATTTAACGATATAGAGAGTGAATAATT T <sub>4</sub>                      |
| ☆253    | 299     | 106    | ATAT AATAAACAACTATTACAAAGATAGACAGTGAATATAGATAAT T <sub>7</sub> CT <sub>5</sub>     |
| ☆253    | 299     | 260    | ATAT GATAAACAACTATTATGAGAACGAGTGATAGAATATAGATAAT TTCT <sub>14</sub> AT             |
| ☆253    | 298     | 83     | ATACAT ATAAACAACTATCATAGAAGCAGACAGTGAATATAGATAAT T <sub>8</sub> CT <sub>6</sub>    |
| ☆282    | 329     | 64*    | ATAT AAAACCACAAAAATAGAAAGCTATAATAGAGATAGAATAATGTTATT CT <sub>9</sub>               |
| ☆284    | 329     | 786    | ATAT AAAACCACAAAAATAGAAAGCTATAATAGAGATAGAATAATGTTA AT <sub>6</sub>                 |
| ☆285    | 329     | 282    | ATAT AAAACCACAAAGGTAGAAGATCGTAATAGAGATAGAATAATATT T <sub>9</sub>                   |
| ☆285    | 329     | 168    | ATAT AAAACCACAAAAATAGAAAGCTATAATAGAGATAGAATAATGTT T <sub>7</sub> CT <sub>4</sub>   |
| ☆288    | 320     | 435    | ATTTTAAGTT AGAGTGAGAAATGTAGTGGAAATAAGATGATA AAAT <sub>11</sub>                     |
| ☆300    | 333     | 268    | AT AACAAAACCACAGAGATGAGAGATTGTAATAAG TATAGTGATAAT <sub>13</sub>                    |
| 321     | 369     | 3062   | ATAT AATACCACATGAATCTTATATGTACGATGGAAGATGAGAATTATG TTTCT <sub>6</sub>              |
| 322     | 369     | 48018  | ATAT AATACCACATGAATCTTATATGTACGATGGAAGATGAGAATTAT T <sub>13</sub>                  |
| □322    | 369     | 142    | ATAT AATACCACATGAATCTTATATGTACGATGGAAGATGAGAATTAT TCT <sub>10</sub>                |
| 324     | 369     | 5034   | ATAT AATACCACATGAATCTTATATGTACGATGGAAGATGAGAATT T <sub>10</sub> G                  |
| ☆345    | 388     | 82     | ATATGTAAC AATATACGTGATCTCAGAGATACTATGTGAATTCTATGT T <sub>7</sub>                   |
| ☆347    | 388     | 95     | ATATGTAAC AATATACGTGATTCAGAGATACTATGTGAATTCTAT TTTAT <sub>18</sub>                 |
| ☆402    | 438     | 417    | ATATA TATAATACAACAAGGAGCGTCATAAGTAAAGTGAA TTCGTTATAT <sub>13</sub>                 |
| 402     | 438     | 128    | ATAT TATAATACAACAAGAAATGTCATAAGTGAGATGAA TTCGTTATAT <sub>9</sub>                   |



Supplementary Table 7: ND7 major gRNA classes

| mRNA 5' | mRNA 3' | copy # | ND7 major gRNA classes                                                            |
|---------|---------|--------|-----------------------------------------------------------------------------------|
| ☆28     | 71      | 6*     | AAT ATACAAATGTAAGAAAACATATCGAGAGTGATGTAGAATGATATT AT <sub>13</sub>                |
| ☆35     | 69      | 765    | ATATA ATAAATGTAAGAGACTATTGAGAGTGGCATAAGG GATATTAT <sub>11</sub>                   |
| ☆36     | 69      | 100761 | ATATA ATAAATGTAAGAGACTATTGAGAGTGGCATAAG TGATATTAT <sub>14</sub>                   |
| ☆36     | 71      | 240    | AAAT ATACAAATGTAAGAAGCTATCAGAGGTAATATAAG TGATATAAT <sub>13</sub>                  |
| ☆36     | 69      | 121    | ATATA ATAAATGTAAGAGACTATTGAGAGTGACATAAG TGATATTAT <sub>13</sub>                   |
| ☆38     | 71      | 113    | ATAT ATACAAATGTAAGAGACTATCGAGAGTGACATA TGTGATATTAT <sub>11</sub>                  |
| ☆59     | 91      | 4376   | ATATATAGATGCA GTGGGTCGAATGTAAGATGATATAGATGTGAA TGT <sub>12</sub>                  |
| ☆95     | 132     | 1      | AT ATAAACAACATAAAATACTATGTGATGTAGGAT CTGTGAATTAAT <sub>9</sub>                    |
| ☆108    | 137     | 13     | ATATAATAAACAACATAAAGTGCCATGTA <del>ACT</del> #CGAGAT TTTTAGATT                    |
| ☆121    | 166     | 396    | ATACAT ATATAAACAATGAATTCACGTGAAGATACGATAGATGATATA T <sub>9</sub> GT <sub>4</sub>  |
| ☆124    | 168     | 3640   | ATATA CAATATAAACAGTAGATTCACGTGAGAAGTATGATAGATAAT T <sub>10</sub> G                |
| 124     | 170     | 3944   | ATAC ATCAATATAAACGATAGATTTACCGTAGAAGTATAGTGAATAAT T <sub>10</sub> AT <sub>3</sub> |
| ☆139    | 170     | 1507   | AT ATCAATATAAACAATAAGTTCGTCATAGA TTTACAGTAGATAAT <sub>12</sub>                    |
| ☆147    | 199     | 563    | ATATATA CACGATGCAGATAATCTATAGTATGATTGATATAAGTGATAAAT <sub>12</sub>                |
| ☆150    | 199     | 200    | ATATATA CACGATGCAGATAATCTATAGTATGATTGATATAAGTGATAAAT AT <sub>12</sub>             |
| 152     | 190     | 988    | AAATTACGATGCAT AATAATCTATGGTACAGTTGATATGAGTGATAA T <sub>7</sub> CT <sub>4</sub>   |
| ☆246    | 269     | 2470   | ATATCAAC ACATAATCTGACTTGTCCGAGTAT CTAAGGAATAAAT <sub>14</sub>                     |
| ☆256    | 311     | 78*    | ATAT AACATAAAGACAATAAGTCTTATTACAGTGAACATTGATATAATTTAATTT TT                       |
| ☆261    | 311     | 3259   | ATAT AACATAAAGACAATAAGTCTTATTACAGTGAACATTGATATAATTT T <sub>8</sub>                |
| ☆261    | 310     | 146    | ATAT ACGTAAAGACAATAGGTGTTTCATTCAGTAGATATTGATGTAATTT T <sub>10</sub>               |
| ☆260    | 293     | 133    | ATATATAAGACAAC GATGCTCATTATGGTAGATACTGATGTAATTTA T <sub>7</sub>                   |
| ☆261    | 293     | 2874   | ATATATAAGACAAC GATGCTCATTATGATAGATACTGATGTAATTT T <sub>10</sub>                   |
| ☆292    | 334     | 91     | ATACT ACAACATCGCGATATATACTTGAATGTAAGGTGATAAA GT <sub>11</sub>                     |
| ☆295    | 338     | 765    | ATATA ACAACAACATCGTAATATGTGCTCCGAGTATAGAGATAAT TAAATAT <sub>13</sub>              |
| ☆297    | 338     | 888    | AT ATAAATAACATCGCAACGTATATTCGAAATGTAGAGATA CAT <sub>11</sub> GT                   |
| ☆327    | 365     | 1225   | ATACAT ATAAACGTATAGGTGCATAATGTAACGATGAATGATGTT AAT <sub>11</sub>                  |
| ☆327    | 373     | 2128   | A TATAATTAATAAACGTATAAATGTGCAGTGTGACGATGAATGATATT AT <sub>13</sub>                |
| ☆352    | 398     | 283    | ATATA GAAACTFAC <del>AG</del> GTAATTTCTGCAATTAGTAGACGTGTAAT AT <sub>7</sub>       |
| ☆390    | 424     | 2283   | ATATTAA ATACATGATATACGCGATAGATTATTAGAGTTATG AGTTAAT <sub>12</sub> GT <sub>3</sub> |
| ☆390    | 424     | 162    | ATATTAA ATACATGATATGCGCAGTAGACTATTAAAGTTATG AGTTAAT <sub>12</sub>                 |
| ☆391    | 427     | 200    | AAATT ACCATACATGATATATACAGTGAACATTTAGAATTAT AGGTAATGT <sub>6</sub>                |
| ☆412    | 452     | 15183  | ATATATAA GGAGACAAATGATCTAGATTCGAGACTGTATATGATATAT T <sub>13</sub>                 |
| ☆416    | 452     | 199    | ATATATAA GGAGACAAATGATCTAGATTCGAGACTGTATATGAT T <sub>7</sub> AT <sub>5</sub>      |
| 414     | 451     | 223    | ATATATAACAAC GAGACAGATAATCTAGATTTGAAGTTATATGTGATAT T <sub>12</sub>                |
| ☆416    | 464     | 5      | AT ATTATAATAACGGAGATGAGCAATTTAGATTCAGAGTTATATGTGAT T <sub>13</sub>                |
| ☆452    | 501     | 3      | AT AAAATGTCATCAATT <del>AG</del> TTCAGTTCTTTGAGTGATTGTGATAAT AT <sub>13</sub>     |
| 486     | 530     | 2523   | ATATAA GCATACGACAATTACGATATGAGTCAGAGAATGTTGTTAATTT T <sub>11</sub>                |
| ☆499    | 526     | 2002   | ATATATAA ATACGACAATCATAACGTGAATCAGAGA CTGTGATTAAT <sub>11</sub>                   |
| ☆508    | 548     | 1129   | ATAT AAATCATGAAAGCTGAGTGTGTATGGCAGTTACGATATA TGTTAAT <sub>14</sub>                |
| 508     | 544     | 116    | ATATAAAA CATGGAAGCTAAGTGTGTATGATGATTATGATATA TGATTAAT <sub>6</sub>                |
| ☆526    | 569     | 3050   | ATATAT ATCATCAAGAATATCTAATGAGACTATGAGAGTTAAATGTATA AT <sub>12</sub>               |
| 531     | 574     | 291    | AAAT ACAAATCATCAGGATACTTGTAAGATTGTGAAAGTTAAGT T <sub>7</sub> GT <sub>4</sub> ATAT |
| ☆540    | 576     | 544    | ATAATAAT AAACAAATCATGAGAGTATCTGATAGAGTTATGA TAGTCAT <sub>5</sub>                  |

| mRNA 5' | mRNA 3' | copy # | ND7 major gRNA classes continued – page 2                                          |
|---------|---------|--------|------------------------------------------------------------------------------------|
| 562     | 603     | 267    | ATATT ACAACAACAAGAAATCAATGAAGTCAGAGATAAAAGTTATTAA T <sub>9</sub> GT <sub>5</sub>   |
| 564     | 596     | 173    | TAGATATCAACAACAT CAGAGAATCAATGAACTAGAGATAGAGTTATT T <sub>10</sub>                  |
| ☆564    | 615     | 1896   | AT ATATTATCAACAACAATAGAAGATTGGCGAAATTAGAGATAGAATTATT T <sub>12</sub>               |
| ☆567    | 615     | 360    | AT ATATTATCAACAACAATAGAAGATTGGCGAAATTAGAGATAGAATT T <sub>9</sub>                   |
| ☆584    | 630     | 831    | ATAAT TAACAACAATATGATATTATCAGTGA CAGTGAGAAATTGATA T <sub>9</sub> AT <sub>5</sub>   |
| ☆596    | 642     | 20     | ATA TATAACAATCCATAGCAGATAGACGTGATATTATTGATGATAGT TTAAAT <sub>18</sub>              |
| ☆629    | 670     | 1258   | ATAT GATAACGATTACCTACAGATAATGAGTCATAGTGATTTATA T <sub>13</sub>                     |
| ☆656    | 699     | 59     | ATATAT ATGACAACTACGTAAGTGCAGATAAAAGTAAGTGATTATTT T <sub>5</sub> CT <sub>6</sub>    |
| ☆679    | 711     | 1      | ATAAGTCAGAAAGTGATAGATCGTGTAAT T <sub>15</sub>                                      |
| ☆679    | 727     | 2      | AAAAAA AAAAATAAATCATATAAATTAAGGGTGATGAACTGTGTAAT T <sub>13</sub>                   |
| ☆711    | 758     | 3229   | ATATAT ACGAGACAAAATATCACTTAGATTATTAGAGATTGAGTTATA AT <sub>13</sub>                 |
| ☆725    | 764     | 55757  | ATATAA TAACGAACGAGGCAGAGTATCATTTAGACTATTAGA TTCAAT <sub>14</sub>                   |
| 731     | 759     | 2867   | ATATATAAT GACGAGATAAGACATCACTTAGACTGT AGAGAT <sub>12</sub> GG                      |
| □751    | 794     | 174    | AT ACTAAATAAACGACGATCTTATACTGTATCTGATGAATGGGATA TTAAT <sub>8</sub> GT <sub>5</sub> |
| □755    | 794     | 167    | AT ACTAAATAAACGACGATCTTATACTGTATCTGATGAATGA TATTAATTGT <sub>7</sub>                |
| 756     | 794     | 48263  | AT ACTAAATAAACGACGATCTTATACTGTATCTGATGAATG TGATATTAAT <sub>14</sub>                |
| □757    | 794     | 318    | AT ACTAAATAAACGACGATCTTATACTGTATCTGATGAAT ATGATATTAAT <sub>4</sub>                 |
| ☆777    | 822     | 5729   | ATATAT TAAAATACAACCTTATGATGACTAAGTGAATGATGATT CAAT <sub>10</sub>                   |
| ☆775    | 830     | 2644   | ATAT ATAAAACATAAAATATGACTTGTAGCAGTTAAGTGAATGATGATTTT T <sub>8</sub>                |
| ☆778    | 830     | 25793  | ATAT ATAAAACATAAAATATGACTTGTAGCAGTTAAGTGAATGATGAT AT <sub>12</sub>                 |
| ☆778    | 830     | 134    | ATAT ATAAAACATAAAATATGACTTGTAGCAGTTAAGTGAATGATGAT AT <sub>7</sub>                  |
| ☆778    | 830     | 331    | ATAT ATAAAACATAAAATATGACTTGTAGCAGTTAAGTGAACGATGAT ATTAAT <sub>14</sub>             |
| ☆778    | 830     | 450    | ATAT ATAAAACATAAAATATGACTTGTAGCAGTTAGGTGAATGATGAT ATTAAT <sub>13</sub>             |
| 778     | 833     | 903    | AAATA ATAACAAAACATGAGATATAACTTGTAGTGATTAGATGAATGATAGT AT <sub>13</sub>             |
| 780     | 833     | 2079   | AAATA ATAACAAAACATGAGATATAACTTGTAGTGATTAGATGAATGATA T <sub>13</sub>                |
| 781     | 833     | 2373   | AAATA ATAACAAAACATGAGATATAACTTGTAGTGATTAGATGAATGAT T <sub>11</sub>                 |
| ☆790    | 839     | 52     | ATAT ATAATCATAACAAGATGTAGAGTACGATTTATAGTGATTAA T <sub>12</sub>                     |
| ☆792    | 845     | 98     | ATAT AAAACAATAATCATGATGAGATATAAAGTGCAGTTTGTGATAATT T <sub>5</sub> GT <sub>4</sub>  |
| ☆834    | 877     | 1279   | AT ATAAACGGTCAAATGTATTGCTTGTAAAGGTAGAGGTGATAATT T <sub>7</sub> CT <sub>5</sub>     |
| ☆843    | 877     | 26437  | ATAT ATAAACGGTCAAATGTATTACTTATAAGATAGAG TTGATAAT <sub>13</sub> C                   |
| ☆863    | 902     | 2491   | ATATA ATATGCATATCAGATAGACGTAGAAATAAGTGATTAAAT T <sub>10</sub>                      |
| ☆872    | 916     | 3      | ATATAA AATCAACAATTCGTATGTATATCGAGTAAATGTAGAAATAAAT T <sub>9</sub>                  |
| ☆901    | 939     | 1365   | ATATAT ACTAATAAAAAGGCATTGCTTACAGATTGATAGATTTAT T <sub>12</sub>                     |
| 907     | 947     | 24     | ATAAAGAAACCAACAGAAGAATATGCTTGTAAAGTTAATGA TCTGTAT <sub>10</sub>                    |
| ☆931    | 978     | 3513   | ATATAT TCAACAACAGATAGAACCAGAGACGAGAAGATTGATGAA T <sub>12</sub>                     |
| ☆932    | 978     | 44852  | ATATAT TCAACAACAGATAGAACCAGAGACGAGAAGATTGATAA T <sub>13</sub>                      |
| ☆940    | 978     | 182    | ATATAT TCAACAACAGATAGAACCAGAGACGAGAAG CTTGATAAT <sub>5</sub>                       |
| ☆941    | 978     | 137    | ATAT TCAACAACAGATAGAACCAGAGACGAGA TATTGATAATTTAAT <sub>14</sub>                    |
| ☆933    | 986     | 2467   | ATAAATAATCAACAGACGAATGAACTAGAGATAGAGAAATTAATA T <sub>12</sub>                      |
| ☆934    | 988     | 11706  | ATATAAATAATCAACAGACGAATGAACTAGAGATAGAGAAATTAAT T <sub>12</sub>                     |
| ☆936    | 988     | 175    | ATATAAATAATCAACAGACGAATGAACTAGAGATAGAGAAATTA T <sub>15</sub>                       |
| ☆937    | 988     | 97     | ATATAAATAATCAACAGACGAATGAACTAGAGATAGAGAAAT TAT <sub>13</sub>                       |

| mRNA 5' | mRNA 3' | copy # | ND7 major gRNA classes continued – page 3                                         |
|---------|---------|--------|-----------------------------------------------------------------------------------|
| 952     | 1000    | 748    | ATAAA GGTAATATCACAGTGTAGATAGTCGGATAGATAGATGAAATT T <sub>10</sub>                  |
| □959    | 1000    | 173548 | ATAAA GGTAATATCACAGTGTAGATAGTCGGATAGATAGATGAAA AT <sub>14</sub>                   |
| 960     | 1000    | 472    | ATAAA GGTAATATCACAGTGTAGATAGTCGGATAGATAGATGAA T8GT <sub>4</sub>                   |
| 961     | 1000    | 265    | ATAAA GGTAATATCACAGTGTAGATAGTCGGATAGATAGATGA T <sub>12</sub>                      |
| □962    | 1000    | 234    | ATAAA GGTAATATCACAGTGTAGATAGTCGGATAGATAGATG TAAAT <sub>3</sub> AT <sub>9</sub>    |
| 963     | 1000    | 371    | ATAAA GGTAATATCACAGTGTAGATAGTCGGATAGATAGAT TTTCT <sub>11</sub>                    |
| □964    | 1000    | 372    | ATAAA GGTAATATCACAGTGTAGATAGTCGGATAGATAGA AAAAA <sub>6</sub> AT <sub>7</sub>      |
| □966    | 1000    | 412    | ATAAA GGTAATATCACAGTGTAGATAGTCGGATAGATA TATGAAAAT <sub>13</sub>                   |
| ☆983    | 1017    | 101    | ATATATAAATAACATAT TAATGGTCTTGATGGTGATATTGTAGTATAA T <sub>12</sub>                 |
| ☆1001   | 1032    | 3      | ATATA TATAAATAACGTGATGATGGTCTCGAT AGTAATTGATAAT <sub>8</sub>                      |
| ☆1015   | 1043    | 12     | AT ACATCACAAACTATAAAGTAATATGATAA GGGTTTCGAT <sub>13</sub> AA                      |
| ☆1030   | 1067    | 2406   | ATATATAACAAGC AATGATGTACTCGGTAAATAGTGACACTGTGAATTAT T <sub>12</sub>               |
| ☆1032   | 1067    | 6797   | ATATATAACAAGC AATGATGTACTCGGTAAATAGTGACACTGTGAATT T <sub>11</sub> C               |
| ☆1055   | 1085    | 40     | CTCATTAGAAA GGTGTTCCGGTATAGGTAGATGATATATTT T <sub>3</sub>                         |
| ☆1057   | 1085    | 44     | ATTAGAAA GGTGTTCCGGTATAGGTAGATGATATAT AT <sub>10</sub>                            |
| ☆1089   | 1121    | 1      | AT ATATGATAACAACAATACTTACTTT GAGGTGTTTTGTGAGTAAAT <sub>14</sub>                   |
| ☆1094   | 1142    | 289    | ATATAAA AGAACATAAACTGACACGAGGGTATAGTGATGAATGATATTT T <sub>4</sub> GT <sub>5</sub> |
| 1094    | 1143    | 6615   | ATATAA GAGAACATAAACTAGCATAGAGGCATAGTAACAAGTGATATTT T <sub>10</sub>                |
| ☆1099   | 1142    | 5793   | ATATAAA AGAACATAAACTGACACGAGGGTATAGTGATGAATGATAT AT <sub>12</sub> C               |
| 1099    | 1143    | 81287  | ATATAA GAGAACATAAACTAGCATAGAGGCATAGTAACAAGTGATAT AT <sub>14</sub>                 |
| 1101    | 1143    | 550    | ATATAA GAGAACATAAACTAGCATAGAGGCATAGTAACAAGTGAT T <sub>8</sub> GT <sub>4</sub>     |
| 1106    | 1143    | 318    | ATATAA GAGAACATAAACTAGCATAGAGGCATAGTAACAA T <sub>11</sub>                         |
| 1107    | 1143    | 177    | ATATAA GAGAACATAAACTAGCATAGAGGCATAGTAACA T <sub>11</sub> G                        |
| 1108    | 1143    | 303    | ATATAA GAGAACATAAACTAGCATAGAGGCATAGTAAC T <sub>11</sub>                           |
| □1099   | 1143    | 162    | ATATAA GAGAACATAAACTAGCATAGAGGCATAGTAACAAATGATAT AT <sub>5</sub>                  |
| □1099   | 1143    | 259    | ATATAA GAGAACATAAACTAGCATAGAGGCATAGTAACAAGCGATAT ACT <sub>12</sub>                |
| □1105   | 1143    | 520    | TATAA GAGAACATAAACTAGCATAGAGGCATAGTAACAAG GGATATAT <sub>6</sub> CT <sub>6</sub>   |
| □1099   | 1143    | 163    | ATATAA GAGAACATAAACTAGCATAGAAGCATAGTAACAAGTGATAT AT <sub>5</sub>                  |
| □1099   | 1143    | 128    | ATATAA GAGAACATAAACTAACATAGAGGCATAGTAACAAGTGATAT AT <sub>9</sub> GT <sub>6</sub>  |
| □1099   | 1143    | 98     | ATATAA GAGAACATAAACTAGCATAGAGACATAGTAACAAGTGATAT AT <sub>9</sub> CT <sub>4</sub>  |
| □1099   | 1131    | 705    | ATATAAGAGAACATAAA CAGCATAGAGGCATAGTAACAAGTGATAT AT <sub>12</sub> GT               |
| ☆1108   | 1145    | 569    | ATATAAACGTAT ACGAGCATAGATCAGTGTGAGAATGTAGTAAT T <sub>7</sub> CT <sub>6</sub>      |
| ☆1094   | 1148    | 295    | ATATAAAA TAAACGAGAATATAAAGTATGATGTAGAGATATAGTGATAAGTAATATTT T <sub>8</sub>        |
| ☆1107   | 1157    | 82     | AT ATGTAATGTAACAGAGAATATAGATTGATGTAGAGATATAGTAATA T <sub>13</sub>                 |
| ☆1150   | 1197    | 213    | AT ATAAACATCCAATAGACGAGTATGTGAGAGATTTGTATGATGTAAT T <sub>10</sub>                 |
| 1181    | 1218    | 4103   | ATATATAA ATGCAATAGAAGATCACGCAATAGATATCTGATAAAT T <sub>12</sub> C                  |
| ☆1183   | 1224    | 1399   | ATA TAAATCATGCAGTAAAAGACTATGTAGATGGATATTCAGTGA TAAT <sub>14</sub>                 |
| ☆1183   | 1223    | 1017   | AAATA AAATCATGCAGTAGAGAACCCTGTAAGTGAGTATCTGATAA TTAT <sub>11</sub>                |
| ☆1183   | 1224    | 138    | ATA TAAATCATGCAGTGAAGAGCTACGTAAATGGATATTCAGTGA TAAT <sub>11</sub>                 |
| ☆1210   | 1257    | 123    | ATAT ACAACATCAATATTACTTAGAACGGTAACTAGATTGTGTAATAA T <sub>14</sub>                 |
| ☆1240   | 1268    | 95     | AAACTAACGATATT CGGATCTGAGAGTAACATTGATATTATTT T <sub>7</sub>                       |
| ☆1242   | 1283    | 6      | AC AAATAACGATTTACGGATTTAGAGACAGTGTAAATGTTAT AT <sub>13</sub>                      |
| ☆1251   | 1282    | 63     | ATATATAT AACTAACGATCTATGGGTTAAAGACAGTGT GAAT <sub>12</sub>                        |
| ☆1269   | 1320    | 6      | ATA TAAACAATCCTACAATGATCTCGTGTATAAGACTGATGATTTA AT <sub>12</sub>                  |

Supplementary Table 8: ND8 major gRNA classes

| mRNA 5' | mRNA 3' | Copy # | ND8 Major gRNA classes                                                            |
|---------|---------|--------|-----------------------------------------------------------------------------------|
| ☆29     | 68      | 1      | AA AAAAAAAAAACATACAGAAATAGAAAAGATAAGAAAGTGATA TATTAT <sub>8</sub>                 |
| ☆34     | 58      | 2      | GTGGG ATATGAAAGTAAAGAGATAAAAAAAAA ATTAAT <sub>13</sub>                            |
| ☆55     | 98      | 2577   | ATAT AAAACAAACAAAAAGAAGAAACAAGAAATGAAGAGAGATATAT T <sub>11</sub> AT               |
| ☆84     | 133     | 633    | A AAATAGTAATACAACAGACAGAGCATATATAGAAATAAGTGAGAAA T <sub>8</sub> AT <sub>7</sub>   |
| ☆84     | 131     | 380    | AT ATAGTAATACAACAAACGAGATACGTATAGAAATAGATGAGAAA T <sub>13</sub>                   |
| 87      | 136     | 6039   | ATAAATAGTAACACAATGAGCAGAGTACGTATAAGAATGAGTAAA T <sub>14</sub>                     |
| □87     | 136     | 292    | GTAAATAGTAACACAATGAGCAGAGTACGTATAAGAATGAGTAAA T <sub>10</sub> GT                  |
| 87      | 135     | 394    | TAAATAGTAACACAATGAGCAGAGTACGTATAAGAATGAGTAAA T <sub>12</sub>                      |
| 87      | 133     | 593    | AAATAGTAACACAATGAGCAGAGTACGTATAAGAATGAGTAAA T <sub>7</sub> CT <sub>7</sub>        |
| □96     | 136     | 191    | ATAAATAGTAACACAATAGACGAGATACGTGTAGAA TAAGTGATTTAAT <sub>11</sub>                  |
| ☆111    | 153     | 70659  | ATATATAAATGGTA AACTCAATGGGTGGATAAGTAGTAATGTGATGAAT T <sub>13</sub>                |
| ☆113    | 153     | 121    | ATATATAAATGGTA AACTCAATGGGTGGATAAGTAGTAATGTGATGA T <sub>9</sub> CT <sub>5</sub>   |
| ☆115    | 153     | 127    | ATATATAAATGGTA AACTCAATGGGTGGATAAGTAGTAATGTGAT T <sub>7</sub> AT <sub>6</sub>     |
| ☆111    | 153     | 245    | ATATATAAATGGTA AACTCAATGGGTGGATAAGTAGTAATGTGATAAAT T <sub>7</sub> CT <sub>4</sub> |
| ☆111    | 153     | 147    | ATATATAAATGGTA AACTCAATGGGTGGATAAGTAGTAATATGATGAAT TGTAATAT <sub>15</sub>         |
| ☆111    | 153     | 479    | ATATATAAATGGTA AACTCAATGGGTGGATAAATAGTAATGTGATGAAT T <sub>3</sub>                 |
| ☆117    | 170     | 4      | ACAT ATAAACTAACAATGGTTGATTTAGTGAAGTGAATGAGTAGTAATATT T <sub>11</sub>              |
| ☆158    | 186     | 169806 | ATAT GAACGCAAGAATGGATTACCACGAGTTAGTAAATTTGATGAT AT <sub>14</sub>                  |
| ☆161    | 198     | 66     | ATATAAT AAACGCAAAAATGGTTACTATGAACTGATAGATTAAT T <sub>8</sub> GT <sub>5</sub>      |
| ☆161    | 187     | 124070 | ATATAAT AAACGCAAAAATGGTTACTATGAACTGATAGATTAAT T <sub>11</sub> C                   |
| ☆161    | 187     | 799    | AAACGCAAAAATGGTTACTATGAACTGATAGATTAAT T <sub>11</sub>                             |
| ☆186    | 230     | 24763  | ATA CAATACAACGCTCTGAATCATATCGATAAAAAGTGTGAGAAAAT T <sub>13</sub>                  |
| ☆186    | 229     | 182    | AATACAACGCTCTGAATCATATCGATAAAAAGTGTGAGAAAAT TTAAT <sub>7</sub> AT <sub>4</sub>    |
| ☆186    | 230     | 109    | ATA CAATACAACGCTCTGAATCATATCGATAAAAAGCTGAGAAAAT T <sub>11</sub>                   |
| ☆186    | 220     | 204    | ATA CAATACAACACTCTGAATCATATCGATAAAAAGTGTGAGAAAAT TTAAT <sub>10</sub>              |
| ☆194    | 230     | 160    | ATA CAATACAACGCTCTGAATCATATCGATAAAAAGTG GGAGAAAAT <sub>10</sub> G                 |
| ☆195    | 230     | 149    | ATA CAATACAACGCTCTGAATCATATCGATAAAAAGT TGAGAAAATTTAAT <sub>11</sub>               |
| ☆196    | 230     | 199    | ATA CAATACAACGCTCTGAATCATATCGATAAAAAG AGTGAGAAAATTTAAT <sub>5</sub>               |
| ☆213    | 244     | 173    | A ACATAAACGACAGGTAATATGATGTTCTGAAT GATATCGATAAT <sub>5</sub> C                    |
| ☆237    | 267     | 2      | CATCCAATGTAT AATTAGGGTAGATTGAGTTATGTAAT T <sub>15</sub>                           |
| ☆240    | 288     | 3      | TATGAACATCCGATACTGAAGTGGTAGATTGAGTTATATA T <sub>10</sub>                          |
| ☆275    | 319     | 109    | ATATAT AAACGATGACTACTAGAATCTACTCAATGTGAATGTTT T <sub>5</sub> GT <sub>6</sub>      |
| ☆276    | 319     | 28492  | ATATAT AAACGATGACTACTAGAATCTACTCAATGTGAATGTT AAT <sub>14</sub>                    |
| ☆276    | 314     | 215    | GATGACTACTAGAATCTACTCAATGTGAATGTT AATTTATGATAT <sub>14</sub>                      |
| 275     | 318     | 384    | ATATAC AACGATGATCACTGAGATTTTACCTAATATGGATGTT T <sub>9</sub>                       |
| 276     | 318     | 51820  | ATATAC AACGATGATCACTGAGATTTTACCTAATATGGATGTT AAT <sub>13</sub>                    |
| □276    | 311     | 186    | ATATACAAT ATGATCACTGAGATTTTACCTAATATGGATGTT AAT <sub>11</sub>                     |
| ☆277    | 317     | 1829   | ATATAT ACGATGACTACCAAAATCTATCTGATATGAATGT GATAATAT <sub>11</sub>                  |
| ☆279    | 319     | 334    | ATATAT AAACGATGACTACTAGAATCTACTCAATGTGAAT T <sub>6</sub> CT <sub>8</sub>          |
| 279     | 318     | 594    | ATATAC AACGATGATCACTGAGATTTTACCTAATATGGAT T <sub>8</sub> AT <sub>8</sub>          |
| ☆284    | 321     | 140    | ATATATA CAAAACGATGATTACCGAGATTTTATTTAATATGA TTGTCTAAT <sub>4</sub>                |
| ☆287    | 319     | 139    | ATATAT AAACGATGACTACTAGAATCTACTCAATG AATGTTAAT <sub>4</sub>                       |
| ☆301    | 344     | 636    | ATAT ATAACCAATGTAGATCGATTTGTGAGATGATGATTGTCAA T <sub>11</sub> ATC                 |

| mRNA 5' | mRNA3' | Copy # | ND8 Major gRNA classes continued                                                  |
|---------|--------|--------|-----------------------------------------------------------------------------------|
| 310     | 353    | 13915  | ATATTA GATGATAACTCAGTGTAGATTGATCTGTAGAATGAT AATAT <sub>12</sub>                   |
| 310     | 350    | 312    | ATGATAACTCAGTGTAGATTGATCTGTAGAATGAT AATATATAATGT <sub>5</sub>                     |
| ☆325    | 358    | 137    | ATAA ATAACGACGATGATTCAGTGTAAATTGGT ATGTGAAATGATGT <sub>12</sub>                   |
| ☆331    | 364    | 1709   | ATAT ATAAATACAACGGTGATAATTCGATGTGA TGATATCTGTAAT <sub>14</sub> AT                 |
| ☆338    | 382    | 1964   | ATATAA ATGCATACAAGAATCATAGTAAGTACAGTGTGATAAATTT T <sub>9</sub>                    |
| ☆339    | 382    | 1073   | ATATAA ATGCATACAAGAATCATAGTAAGTACAGTGTGATAAAT AT <sub>8</sub> GT <sub>5</sub>     |
| ☆350    | 386    | 1269   | ATATA AAACATGTATACAAAAATTACAGTAAATGCGACGA AAATAAT <sub>13</sub>                   |
| ☆372    | 417    | 2*     | ATAT ATAAATGCGTAATGGTATCTTTCGGGTAGATATGTGTATAAA T <sub>14</sub>                   |
| ☆391    | 431    | 23*    | AT ATATATAACAACAATGGGTGTATAATGGTATCTGAT TGTGCATTAATTTAAAAT <sub>14</sub>          |
| ☆405    | 434    | 9      | AT AAAACACATAATAAATGATGAGTGCCTGAT ATAGGTATAAT <sub>12</sub>                       |
| ☆411    | 443    | 923    | A TAAACAACAAGAACACATAGCAGATAGTGGGTG ACGTATATGAT <sub>13</sub>                     |
| ☆411    | 442    | 1950   | AAAAA AAACAACAAGAACACATAGCAGATAGTGGGTG ACGTATAT <sub>11</sub> C                   |
| ☆423    | 466    | 2651   | ATAAACTTGGG CGCTAATAGATATATGGTTAGATAATGAGAATATATAGT TAAT <sub>11</sub>            |
| ☆423    | 466    | 203    | TAAAACTTGGG CGCTAATAGATATATGGTTAGATAATGAGAATATATAGT TAAT <sub>14</sub>            |
| ☆425    | 466    | 5218   | ATAAACTTGGG CGCTAATAGATATATGGTTAGATAATGAGAATATATA T <sub>14</sub>                 |
| ☆426    | 466    | 24242  | ATAAACTTGGG CGCTAATAGATATATGGTTAGATAATGAGAATATAT T <sub>12</sub> C                |
| ☆428    | 466    | 1071   | ATAAACTTGGG CGCTAATAGATATATGGTTAGATAATGAGAATAT T <sub>10</sub>                    |
| ☆426    | 482    | 13     | AT AAACTTGGGCGCTAATAGATATATGGTTAGATAATGAGAATATAT T <sub>4</sub> GT <sub>7</sub>   |
| □477    | 512    | 176    | ATATA TAAATAACATAAGACGATAACTGAATAATAGAAAT AAGTGTCAAT <sub>14</sub>                |
| ☆489    | 531    | 21576  | ATAG ATAAAACACAAATAAAGGTCAAGTGATATAGAGTGATGATTAA T <sub>12</sub> AT               |
| ☆489    | 528    | 5835   | ATAAATAT AAACACAAATAAAGGTCAAGTAATGTAGAGTGATAATTAA T <sub>12</sub>                 |
| ☆494    | 536    | 1242   | ATATAT ACTACATAAAACACAGATAAGAATCAGATAGTGTGAGATAATA T <sub>9</sub> GT <sub>5</sub> |
| ☆495    | 536    | 151    | ATATAT ACTACATAAAACACAGATAAGAATCAGATAGTGTGAGATAAT TTTTCT <sub>10</sub>            |
| 495     | 539    | 884    | ATAT ATAACACACAAAATATAGGTAAAAGTTAGATGATGTGAAATGAT T <sub>11</sub>                 |
| ☆500    | 540    | 2861   | ATATAT AATAACTACACGAGACATGAATAGAAATTAAGTGTGTAAA T <sub>12</sub>                   |
| ☆554    | 598    | 20     | ATATA TAATTTACCGTGAATTTCTTTAGATTGTAGATATGATAA T <sub>13</sub>                     |
| ☆554    | 598    | 7      | ATATA TAATTTACCGTGGATTTCTTTAGATTATAGATATGATAA T <sub>6</sub>                      |

Supplementary Table 9: ND9 major gRNA classes

| mRNA 5' | mRNA 3' | Copy # | ND9 major gRNA Classes                                                               |
|---------|---------|--------|--------------------------------------------------------------------------------------|
| ☆33     | 71      | 18     | ATAT AAACATAAACGAAATGAGCATAGAAGTATATGTATGATG ATATTAT <sub>14</sub>                   |
| ☆60     | 105     | 540    | A TATAACACAAACAATAGAATAAAGTTAAGTGAGAATATGAGTGA TTTAT <sub>11</sub>                   |
| ☆87     | 124     | 1      | ATATCAAC AAACAAATAGAGCACTGCTCTATGATATAAGTGATAA TTCT <sub>9</sub>                     |
| ☆117    | 160     | 1145   | ATAT ATAAAACAATAAAGAAATAGAAGGCTACAGTTAATGAGATAAAT T <sub>13</sub>                    |
| ☆130    | 167     | 137    | AAAATTAACAAAACAATAAAAAGAACGAGAAATTACAGT GAATGAAGTAAAT <sub>7</sub>                   |
| ☆149    | 193     | 1196   | ATAT AATAAAAACATACAATAAAAATAGAAGGAACTAATAAGATGATAG T <sub>15</sub>                   |
| ☆176    | 216     | 3869   | ATACAATAT AAAACAAAAGTCACAGATTAAGGGATAGAGATGTGTGATAA T <sub>14</sub>                  |
| ☆177    | 216     | 357    | ATACAATAT AAAACAAAAGTCACAGATTAAGGGATAGAGATGTGTGATA T <sub>11</sub>                   |
| 201     | 242     | 87     | ATATAA AATCAATAACAGATCATGATGATATAGAGATAGAAGTTATAA T <sub>7</sub> GT <sub>7</sub>     |
| ☆239    | 288     | 23*    | AT AAATATACAACAATATAGAACGATGAAAGTGAAGATTATAAGAGTTAATT T <sub>5</sub> CT <sub>6</sub> |
| 238     | 279     | 86     | AAAATTAT ACAACATAAGACGACGAAGATAAAGGTCATAGAGATTAATTA T <sub>11</sub>                  |
| 239     | 279     | 569    | AAATTAT ACAACATAAGACGACGAAGATAAAGGTCATAGAGATTAATT T <sub>5</sub> CT <sub>6</sub>     |
| □239    | 268     | 561    | AACATAAAT CGGTGAAGATAGAGACTATGAGAATTAATT T <sub>7</sub>                              |
| □240    | 268     | 346    | ATAAAT CGGTGAAGATAGAGACTATGAGAATTAAT ATGT <sub>15</sub>                              |
| ☆272    | 312     | 43     | ATAA GAACACACAGAGACAAGCAGAGTAAAGTGTATAGTGACATA T <sub>6</sub>                        |
| ☆297    | 339     | 270    | ATAT ACAACAACACAAGATAGAGCACAAATGAATGCACAGGGATAA TAT <sub>11</sub>                    |
| ☆298    | 343     | 1741   | GTAACAACAACACAGAGCAGAATACAAGTGAGTATATGAGAATA T <sub>11</sub> GT                      |
| ☆298    | 343     | 2681   | ATAACAACAACACAGAGCAGAATACAAGTGAGTATATGAGAATA T <sub>11</sub>                         |
| ☆303    | 339     | 44686  | ATAT ACAACAACACAAGATAGAGCACAAATGAATGCACAG TGATAAT <sub>13</sub>                      |
| ☆304    | 339     | 139    | ATAT ACAACAACACAAGATAGAGCACAAATGAATGCACA CTGATAAT <sub>13</sub>                      |
| ☆319    | 366     | 36     | AT ATTAANAACACAATCCGAAGGTACAAATAGACAGTATAAGATAAAAT T <sub>11</sub>                   |
| ☆319    | 366     | 17     | AT ATTAANAACACAATCCGAAGGTATAAATAGACAGTATAAGATAAAAT TAAT <sub>19</sub>                |
| ☆349    | 392     | 270    | ATATAT AGACGCATAATAAAAAGCAACTGAGGCTAGAATATGATTTAA T <sub>7</sub> GT <sub>11</sub>    |
| ☆349    | 392     | 232    | TAT AAACGTATAACAAAAGCAGTTAAAGCTAGAATGTGATTTAA T <sub>8</sub> AT <sub>5</sub>         |
| ☆352    | 392     | 10040  | ATATT AAACGCATAACAGAAATGATTAGAAGTGAAGATATGATT AAT <sub>13</sub> C                    |
| □382    | 421     | 1      | AATCAAAATATTCGTGTTCTGATGATAGAGATGTATAAT T <sub>10</sub>                              |
| 409     | 447     | 761    | ATATAAA ATTACCAACAGAATAGAAGCTAGACAAGTTAAGATATTT T <sub>8</sub>                       |
| 409     | 447     | 667    | ATATAAA ATTACCAACAGAATAGAAGCTAGACAAGTTAAGATATTT T <sub>12</sub>                      |
| ☆439    | 484     | 72     | ATAT AAACCAATCAACGAGTAAATGATGTAGAGTATTATTGTCAAT T <sub>8</sub> AT <sub>4</sub>       |
| 468     | 514     | 234    | ATAT ATAACACTTCAACGGAGAGAGACCAATGAGAGATCAGTTAATA T <sub>7</sub> GT <sub>5</sub>      |
| ☆502    | 549     | 746    | ATATAAATAACAATAACAAGTGAATCAGATAATGGATGATGTTTCAAT T <sub>12</sub> G                   |
| ☆533    | 566     | 11     | AACGTACATATG ATCTCTCTGCTAGTATATAAGATGATAATAT T <sub>11</sub>                         |
| ☆534    | 566     | 15     | AAACGTACATATG ATCTCTCTGCTAGTATATAAGATGATAATA AT <sub>14</sub>                        |
| ☆535    | 578     | 13     | ATATT AACGTACATACTGTCTTCTCTATGACATATAAGATGATAAT T <sub>13</sub>                      |
| ☆568    | 604     | 76     | ATATA TATGCAACAACAGAGATAATATTGTAGATGTATATGT GATATCGT <sub>10</sub>                   |
| ☆582    | 612     | 66     | TATT AATTGGTATGTGACAATAGAAGTGATATT T <sub>9</sub>                                    |
| ☆609    | 644     | 274    | ATATATA AGAATTACAATGGT GTATTAAGTGAAGTAAATGTAATGAGAATT T <sub>12</sub>                |
| ☆615    | 659     | 1      | ATATATAA AGGATTACAGTGGTATATTGAATAGAGTGTAAATG T <sub>12</sub>                         |

Supplementary Table10: RSP12 major gRNA classes

| mRNA 5' | mRNA 3' | copy # | RSP12 Major gRNA classes                                                           |
|---------|---------|--------|------------------------------------------------------------------------------------|
| 35      | 76      | 2218   | ATA AACAACCGTACAGAAGTTACATATGCAGAGAAGGTGAGAT TTAT <sub>12</sub>                    |
| ☆43     | 78      | 12531  | ATAT ACAACAACCATATGAAGATCATGTACGTAGAAGA TTGATATAT <sub>14</sub>                    |
| ☆63     | 109     | 5122   | AT ATAATATAAAAACAAATAAGACAGAGTGTAGATAGTAATTGTATGA TAT <sub>12</sub>                |
| ☆73     | 115     | 120    | A TATATAATAACATAAAAACAAATAGAACGAGATGTAATGATA TCTAT <sub>7</sub> AT <sub>5</sub>    |
| ☆74     | 106     | 1212   | ATAT ATATAAAAACAAATAGAATAGAACGTAGATGAT TACTGTATAAT <sub>10</sub> AT                |
| ☆92     | 121     | 90     | AACTGGGCATCT CGGATTTGTATAGTGATATAAAGTGAATAA T <sub>4</sub>                         |
| ☆96     | 121     | 233    | AATCA CGGATTTATATAGTAACGTAAAATGA TATTAT <sub>12</sub>                              |
| ☆96     | 131     | 2      | ATATAGAATTA GGCAATCGCGGATTTATATAGTAACGTAAAATGA TAT <sub>10</sub>                   |
| ☆119    | 158     | 3      | ACT TACAATACACGTTGGTTATCGGAGTTAGGTGATTGTG ACTTAT <sub>10</sub>                     |
| □132    | 164     | 18     | CATATAAA GGCATATAGTATACGTCGGTTACTGGGATTTGTAAT <sub>7</sub>                         |
| □139    | 170     | 44     | ATATA ACGGCATATAGTATACGTCGGTTACTAGGATTTGTAAT <sub>4</sub>                          |
| ☆158    | 207     | 67     | ATAT ATAACGCAACATTCGAATGAGATTATGTAGATGAAATATGGTAT TAT <sub>5</sub>                 |
| ☆164    | 195     | 146    | ATAACGCAACA TCAGATGAGATTATATAAGTGAGATATG ATATAT <sub>11</sub>                      |
| 169     | 208     | 4724   | ATAAAT AACAACGCAATATCCGAGTAAGATTGTATAAGTGAGATAT AT <sub>12</sub>                   |
| □194    | 235     | 3025   | ATATATAATGAC TAACTAAACTGATAAAGCAGTAGAAGAGATGATGTAATATTT T <sub>11</sub>            |
| □196    | 235     | 222    | TAATGAC TAACTAAACTGATAAAGCAGTAGAAGAGATGATGTAATAT AT <sub>14</sub>                  |
| □198    | 235     | 4950   | ATATATAATGAC TAACTAAACTGATAAAGCAGTAGAAGAGATGATGTAAT T <sub>11</sub>                |
| ☆200    | 246     | 609    | ATAT ATAATGACATAATTAGACTGATAAGATAACGAGAAAAGTGATGTA T <sub>12</sub>                 |
| ☆203    | 246     | 341382 | ATATAT ATAATGACGTAACGTAGCTAATGAGGCAATGAGAGAGATAAT AT <sub>14</sub>                 |
| ☆204    | 246     | 430    | ATATAT ATAATGACGTAACGTAGCTAATGAGGCAATGAGAGAGATAA AAT <sub>13</sub>                 |
| ☆205    | 246     | 1091   | ATATAT ATAATGACGTAACGTAGCTAATGAGGCAATGAGAGAGATA T <sub>13</sub>                    |
| ☆206    | 246     | 922    | ATATAT ATAATGACGTAACGTAGCTAATGAGGCAATGAGAGAGAT T <sub>13</sub> G                   |
| ☆203    | 246     | 544    | ATATAT ATAATGACGTAACGTAGCTAATGAAGCAATGAGAGAGATAAT AT <sub>13</sub>                 |
| ☆203    | 250     | 267    | AT ATAAATAATGACATAACTAGGTTAGTAAAGTGACGAAGAAGATAAT ATTAT <sub>4</sub>               |
| ☆203    | 246     | 370    | ATATAT ATAATGACGTAACGTAGCTAATGAGGCAATGAGAGGGATAAT AT <sub>12</sub>                 |
| ☆203    | 246     | 1324   | ATATAT ATAATGACGTAACGTAGCTAATGAGGCAATGAGAGAAATAAT AT <sub>9</sub> AT <sub>5</sub>  |
| ☆205    | 246     | 177    | ATATAT ATAATGACGTAACGTAGCTAATGAGGCAATGAGAGAAATA T <sub>9</sub> GT <sub>5</sub>     |
| ☆207    | 246     | 370    | ATATAT ATAATGACGTAACGTAGCTAATGAGGCAATGAGAGAGA AATAT <sub>13</sub>                  |
| ☆208    | 246     | 484    | ATATAT ATAATGACGTAACGTAGCTAATGAGGCAATGAGAGAG TTAATAT <sub>11</sub>                 |
| ☆209    | 246     | 964    | ATATAT ATAATGACGTAACGTAGCTAATGAGGCAATGAGAGA TAATAT <sub>12</sub>                   |
| ☆210    | 246     | 282    | ATATAT ATAATGACGTAACGTAGCTAATGAGGCAATGAGAG CGATAATAT <sub>12</sub> CT              |
| ☆211    | 246     | 268    | ATATAT ATAATGACGTAACGTAGCTAATGAGGCAATGAGA T <sub>12</sub>                          |
| ☆212    | 246     | 176    | ATATAT ATAATGACGTAACGTAGCTAATGAGGCAATGAG CGAGATAATAT <sub>10</sub> CT <sub>3</sub> |
| ☆203    | 246     | 312    | ATATAT ATAATGACGTAACGTAGCTAATGAGGCAATGAGAGAGATAAT AT <sub>12</sub>                 |
| ☆203    | 246     | 530    | ATATAT ATAATGACGTAACGTAGCTAATGAGACAATGAGAGAGATAAT AT <sub>11</sub> G               |
| ☆203    | 246     | 196    | ATATAT ATAATGACGTAACGTAGCTAATGAGGCAATGAGAGAGATAAT AT <sub>8</sub> AT <sub>4</sub>  |
| ☆203    | 246     | 141    | ATATAT ATAATGACGTAACGTAGCTAATGAGGCGATGAGAGAGATAAT AT <sub>9</sub> GT <sub>9</sub>  |
| ☆203    | 246     | 117    | ATATAT ATAATGACGTAACGTAGCCAATGAGGCAATGAGAGAGATAAT AT <sub>9</sub> AT <sub>6</sub>  |
| ☆203    | 246     | 157    | ATATAT ATAATGACGTAACGTAGCTAATGGGGCAATGAGAGAGATAAT AT <sub>10</sub> C               |
| ☆203    | 246     | 193    | ATATAT ATAATGACGTAACGTAGCTAATGAGGCAACGAGAGAGATAAT AT <sub>9</sub> AT <sub>11</sub> |
| ☆203    | 246     | 130    | ATATAT ATAATGACGTAACGTAAGCTAATGAGGCAATGAGAGAGATAAT AT <sub>13</sub>                |
| ☆203    | 246     | 173    | ATATAT ATAATGACGTAACGTAGCTAATAAGGCAATGAGAGAGATAAT AT <sub>14</sub>                 |
| ☆203    | 246     | 119    | ATATAT ATAATGACGTAACGTAGCTAATGAGGTAATGAGAGAGATAAT AT <sub>12</sub>                 |
| ☆203    | 246     | 116    | ATATAT ATAATGACGTAACGTGGCTAATGAGGCAATGAGAGAGATAAT AT <sub>13</sub>                 |

| mRNA 5' | mRNA 3' | copy # | RSP12 Major gRNA classes continued                                               |
|---------|---------|--------|----------------------------------------------------------------------------------|
| ☆234    | 264     | 35     | TAG TGCCTTCTATAGTAGATGATGATATA TGAT <sub>12</sub>                                |
| □234    | 280     | 24     | ATATA AGATCAACAAAAGTCCATTTTCTGTAGTAAGTGTGATGATATA T <sub>9</sub> AT <sub>4</sub> |
| □248    | 281     | 14     | ATA TAAATCAACAGAACTGCCATCTTTTGTAGTA TAGTGATATAAT <sub>12</sub>                   |
| □267    | 322     | 10     | ATA TACAATACGTGTATGATATTTTATACTGGGTAGATCAGTGAAATT T <sub>7</sub>                 |
| □267    | 322     | 16349  | ATA TACAATACGTGTATGATATTTTATACTAGGTAGATCAGTGAAATT T <sub>12</sub>                |
| 309     | 349     | 128    | AAATAT AACATATCTTATATCTGAATCTAACTGTAATATGTG AAT <sub>15</sub>                    |
