# Supplementary material for: The insect-phase gRNA transcriptome in Trypanosoma brucei
Source: PubMed Central journal article supplement — Nucleic Acids Res. 2013 Oct 29;42(3):1873–86. doi: 10.1093/nar/gkt973 (PMC3919587; doi:10.1093/nar/gkt973), 2013-10-29

Supplementary Figure 2: gRNA transcript quantification. Abundance of gRNA transcripts (y-axis, note log scale) that align to a respective nucleotide in the fully edited mRNA. Both nucleotides and deletion sites in the fully edited mRNA were numbered starting from the 5' end (+1 = 0). Shaded boxes indicate identified gRNAs that guide specific editing sites (numbers in parentheses). A.) Cytochrome Oxidase III; B.) C-Rich Region 4; C.) NADH Dehydrogenase Subunit 3; D.) NADH Dehydrogenase Subunit 7; E.) NADH Dehydrogenase Subunit 8; F.) NADH Dehydrogenase Subunit 9. All individual data points were designated using an open circle.

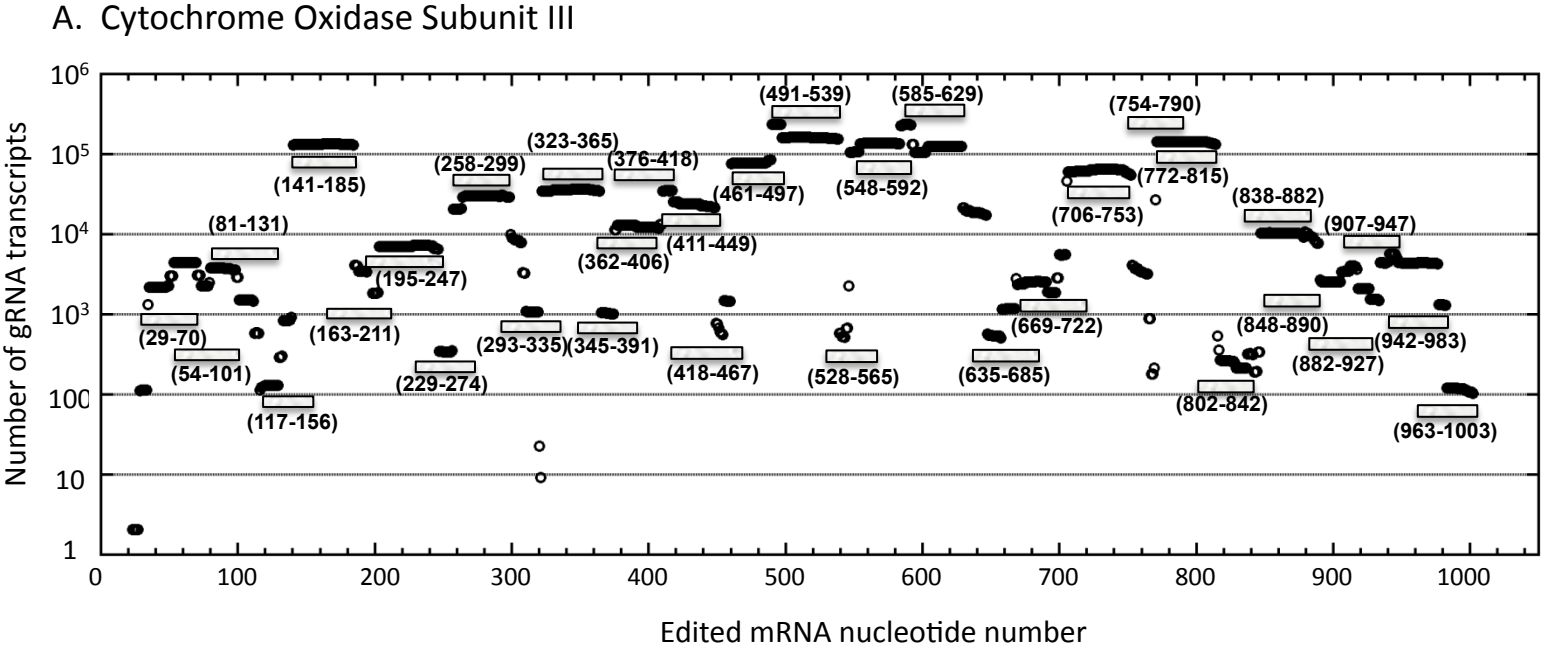

### B. C-Rich Region 4

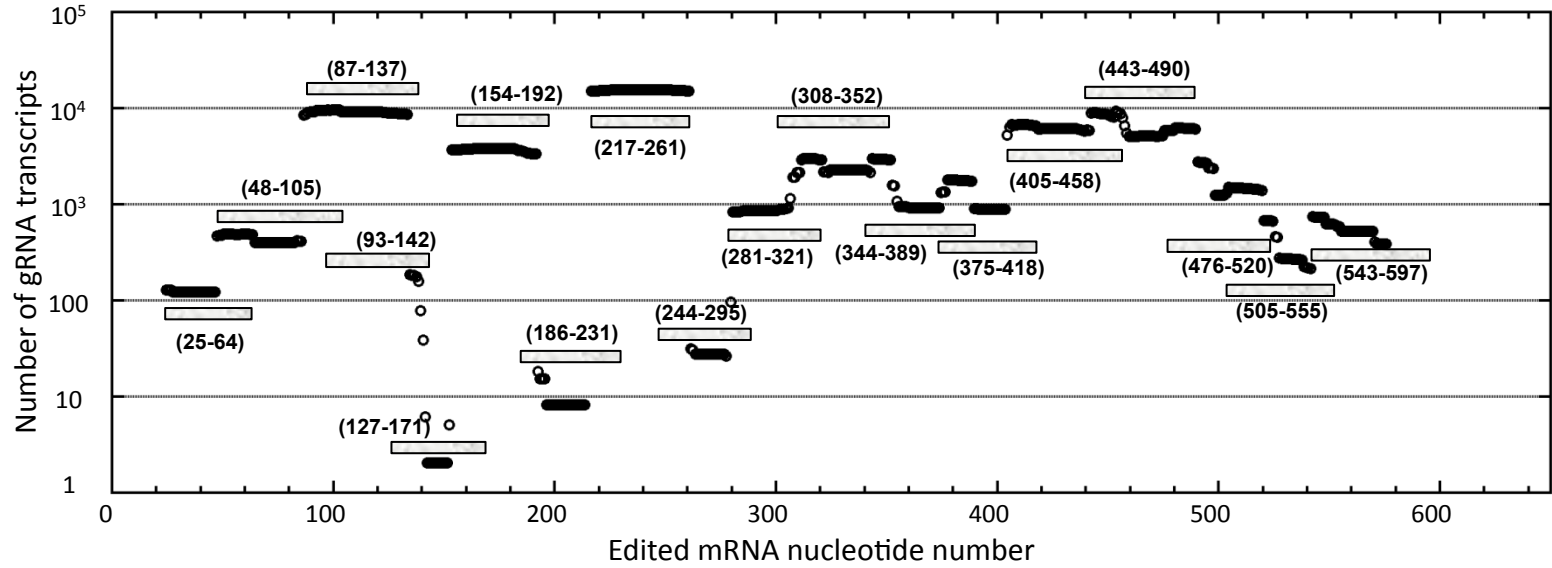

### C. ND3

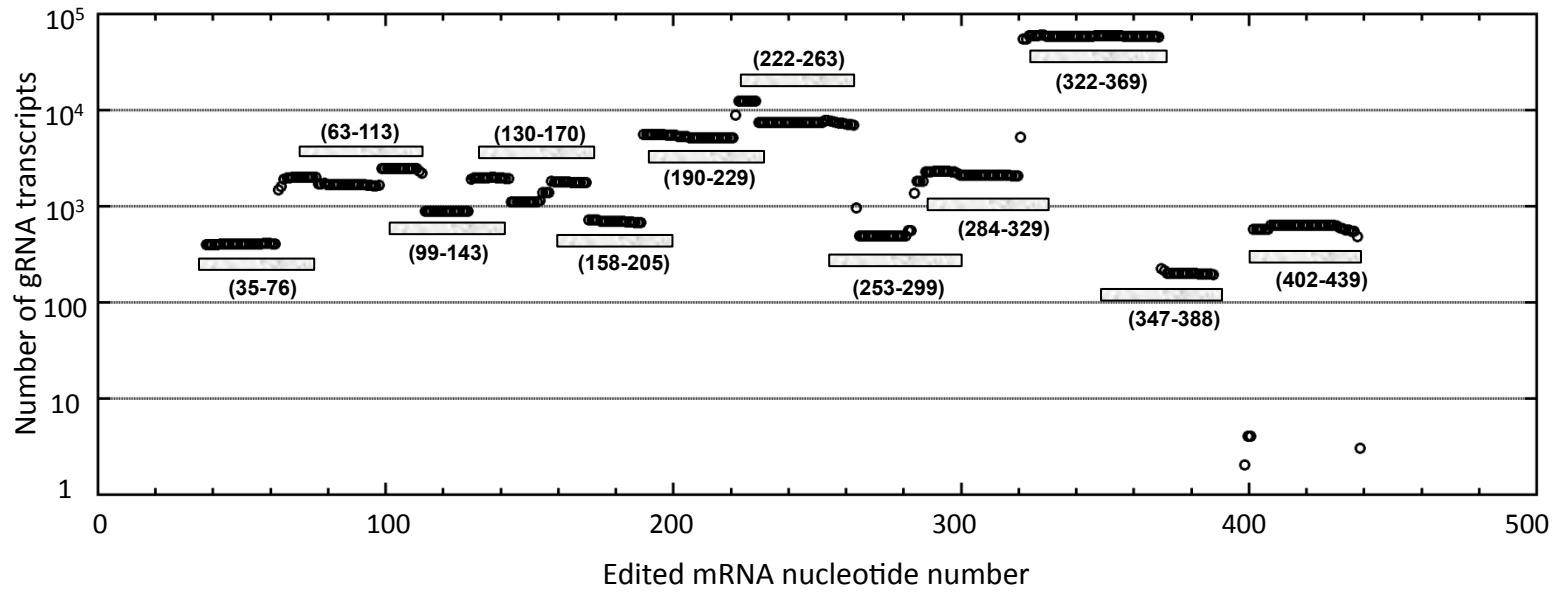

D. ND7

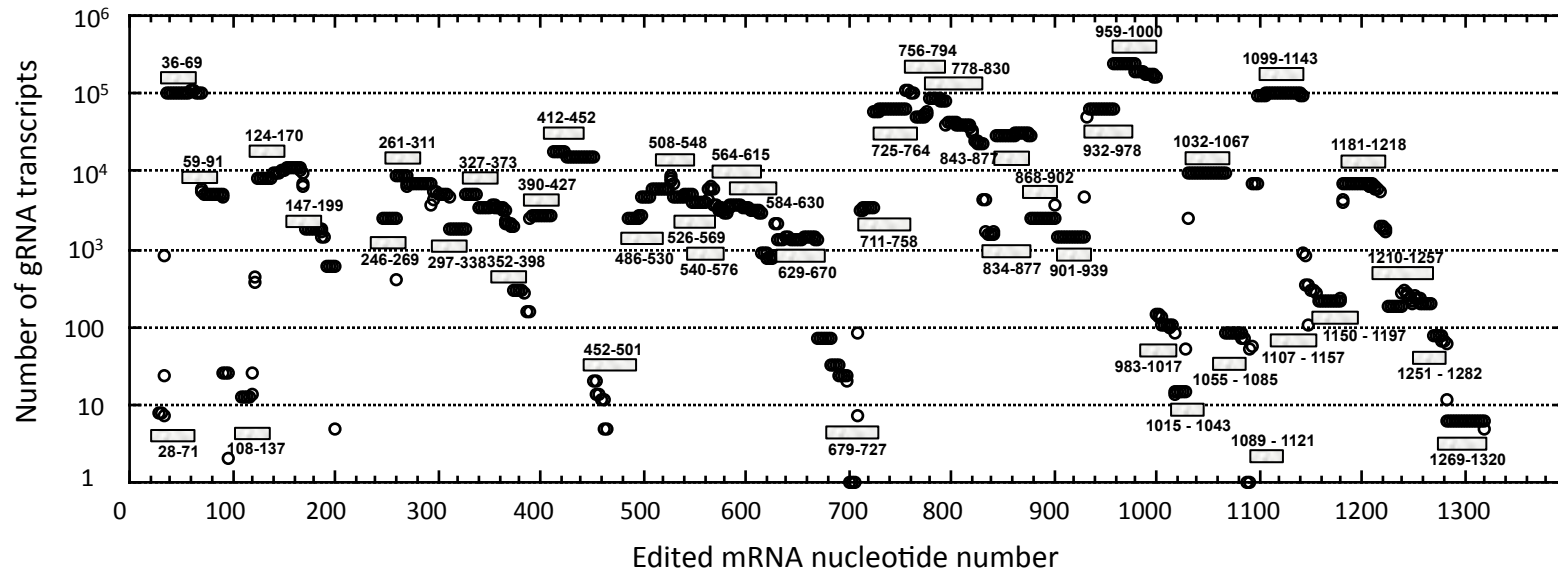

E. ND8

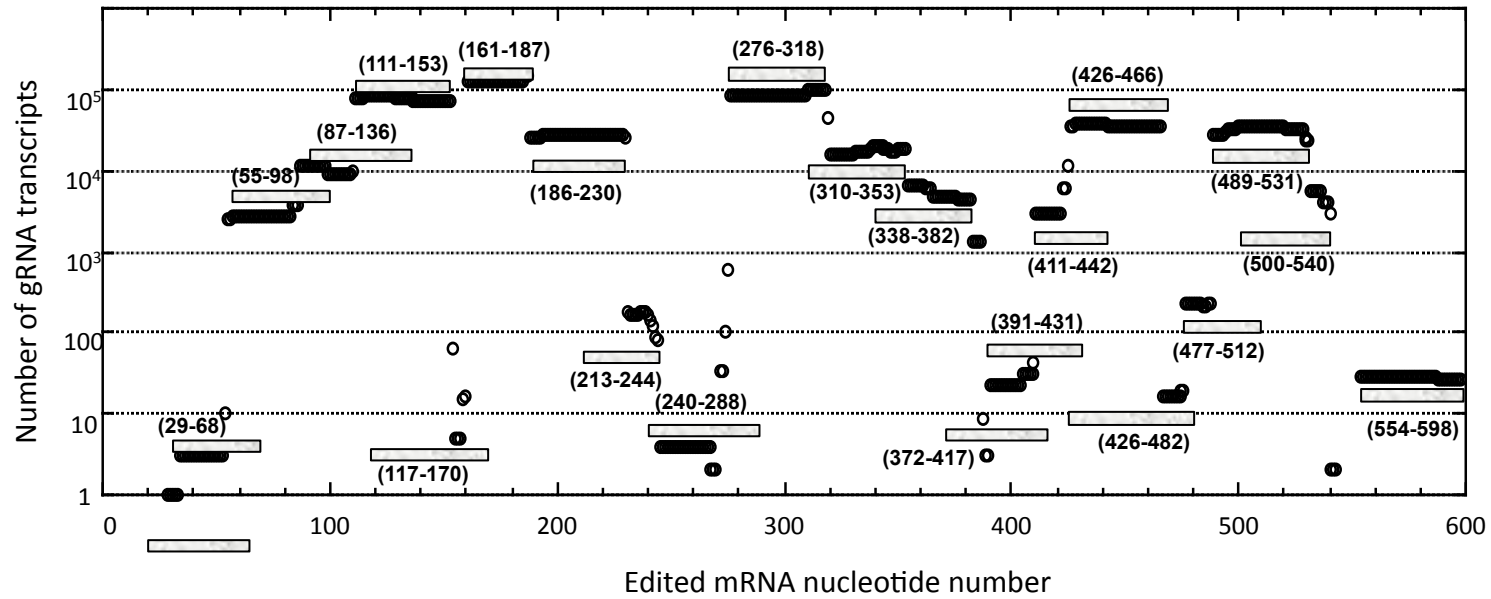

F. ND9

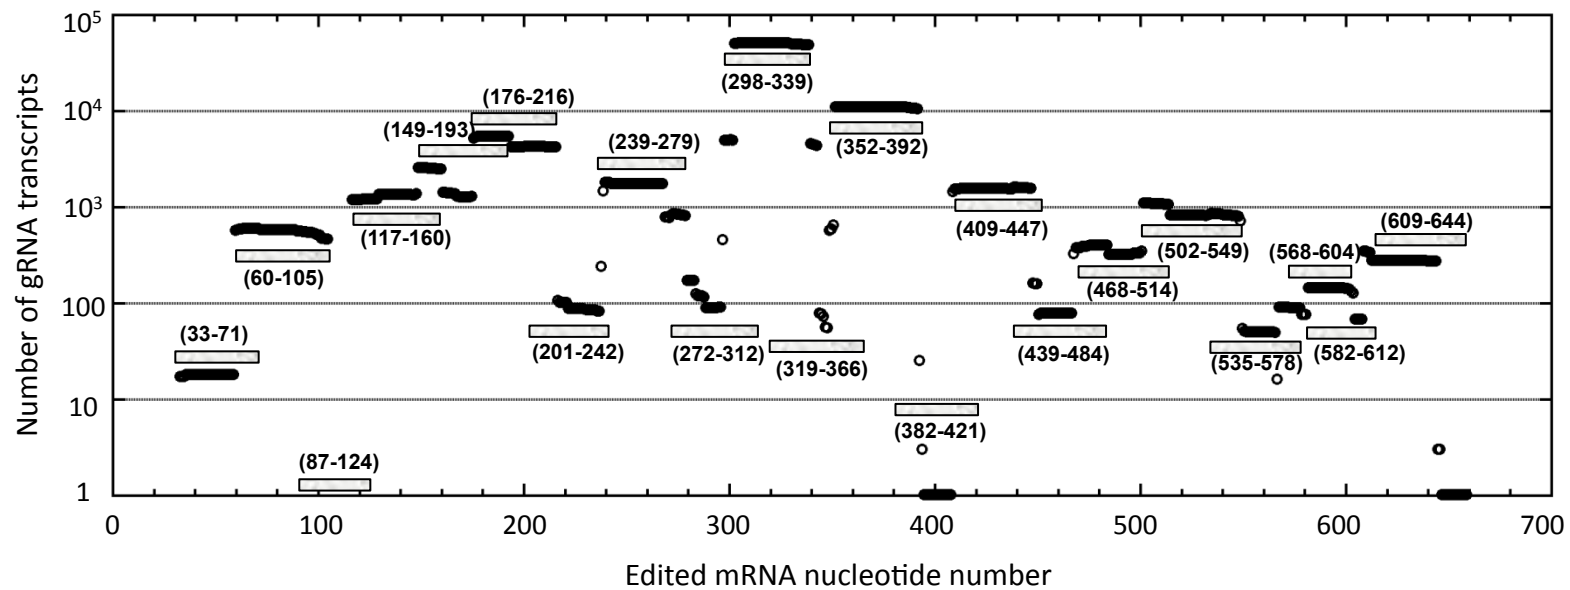

Supplement: supp_gkt973_nar-01806-h-2013-File015.pdf [file supp_gkt973_nar-01806-h-2013-File015.pdf]
